# Supplementary material for: Arylation of 2-substituted pyridinesvia Pd-catalyzed decarboxylative cross-coupling reactions of 2-picolinic acid
Source: Royal Society of Chemistry journal article supplement (doi:10.1039/c2cc36720c), 2012-11-09

# Arylation of 2- Substituted pyridines via Pd-Catalyzed Decarboxylative Cross-Coupling Reactions of 2-Picolinic acid

5

## Supporting Information

1. Abbreviation of various ligands used in Pd-catalyzed cross-coupling reactions
2. General experimental procedures
3. Characterization data of compounds

### Various Ligands Used in Pd-catalyzed Cross-coupling Reactions

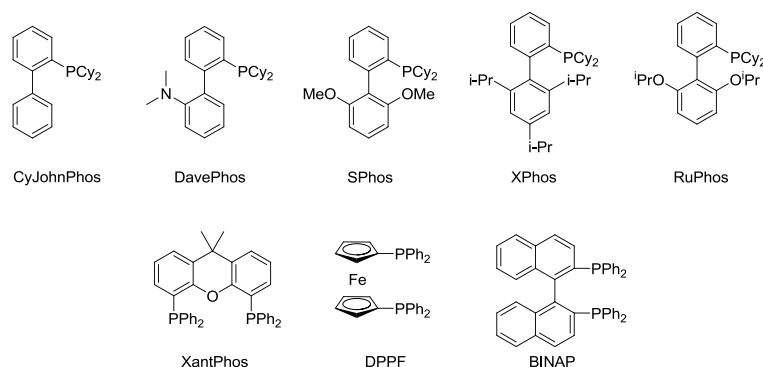

10

Scheme 1 Abbreviation of Various Ligands

**General Methods.** All reactions were performed in dried glass reaction tube equipped with a magnetic stir bar under argon gas atmosphere. Flash column chromatography was performed using silica gel (60-Å pore size, 32-63 μm, standard grade). Analytical thin-layer chromatography was performed using glass plates pre-coated with 0.25 mm 230-400 mesh silica gel impregnated with a fluorescent indicator (254 nm). Thin layer chromatography plates were visualized by exposure to ultraviolet light. Solvents were re-distilled prior to use in the reactions. The transformation progress was indicated by GC-MS using Thermo Fisher Scientific DSQ II. Melting point were obtained by XT4A micro Melting-point Measurement Instruments, thermometer was unrevised. The high resolution mass spectrum was

received via Agilent Technologies 6540 UHD Accurate-mass Q-ToF LC/MS, with ESI as ion source. NMR spectra were obtained on Bruker DPX 400 systems using CDCl<sub>3</sub> (3t, 3u using acetone) as solvent, TMS as internal standard substance, with proton and carbon resonances at 400 and 100 MHz, respectively.

5 **Experimental procedures Section.** A dried glass reaction tube equipped with a magnetic stir bar was charged with PdCl<sub>2</sub> (5.3 mg, 0.03 mmol, 5 mol %), BINAP (18.7 mg, 0.03 mmol, 5 mol %), K<sub>2</sub>CO<sub>3</sub> (248.0 mg, 1.2 mmol, 3 equiv), Cu<sub>2</sub>O (51.4 mg, 0.6 mmol, 0.6 equiv), 3Å molecular sieve (200 mg), 2-picolinic acid (73.8 mg, 0.6 mmol, 1.0 equiv) and aryl(heteroaryl, alkyl) bromides (0.9 mmol, 1.5 equiv);  
10 anhydrous DMA (3.5 mL) was added and the mixture was charged with argon gas three times. The reaction mixture was then stirred at 150°C under argon gas until 2-picolinic acid were consumed. The reaction progress was monitored by TLC. The reaction mixture was filtered through a pad of celite, and washed with ethyl acetate after cooling to room temperature. The filtrate was poured into H<sub>2</sub>O and extracted  
15 with ethyl acetate. The combined organic layer was dried with MgSO<sub>4</sub> and filtered. The filtrate was concentrated in vacuo. The residue was purified by silica gel flash chromatography to produce the desired product. The products were characterized by  
<sup>1</sup>H NMR, <sup>13</sup>C NMR and GC-MS.

20

25

30

### Characterization data of compounds.

**4-(pyridin-2-yl)benzotrile (3a, yield 75%):** White solid. m.p. 91-92°C

<sup>1</sup>H NMR (400 MHz, CDCl<sub>3</sub>, ppm): δ 8.74(d, *J* = 4.6 Hz, 1H), 8.12 (d, *J* = 8.6Hz, 2H), 7.83(td, *J* = 7.5, 1.7Hz, 1H), 7.77(m, 3H), 7.32(ddd, *J* = 7.3, 4.9, 1.4Hz, 1H). <sup>13</sup>C NMR (100 MHz, CDCl<sub>3</sub>, ppm): δ 155.2(s), 150.0(s), 143.4(s), 137.1(s), 132.6(s), 127.5(s) 123.4(s), 120.9(s), 118.8(s),112.4(s).

**2-(4-methoxyphenyl)pyridine (3b, yield 47%):** White solid. m.p. 53-55°C

<sup>1</sup>H NMR (400 MHz, CDCl<sub>3</sub>, ppm): δ 8.65(d, *J* = 4.8 Hz, 1H), 7.95(d, *J* = 8.8 Hz, 2H), 7.70(td, *J* = 7.7, 2.0 Hz, 1H), 7.66(d, *J* = 7.4 Hz, 1H), 7.16(m, 1H), 6.99(d, *J* = 8.8 Hz, 2H), 3.86(s, 3H). <sup>13</sup>C NMR (100 MHz, CDCl<sub>3</sub>, ppm): δ 160.4(s), 157.1(s), 149.5(s), 136.6(s), 132.0(s), 128.1(s), 121.4(s), 119.8(s), 114.1(s), 55.3(s).

**2-phenylpyridine (3c, yield 43%):** colorless oil.

<sup>1</sup>H NMR (400 MHz, CDCl<sub>3</sub>, ppm): δ 8.70(d, *J* = 5.0 Hz, 1H), 7.99(m, 2H), 7.74(m, 2H), 7.48(m, 2H), 7.23(m, 1H), 7.42(m, 1H). <sup>13</sup>C NMR (100 MHz, CDCl<sub>3</sub>, ppm): δ 157.5(s), 149.6(s), 139.4(s), 136.7(s), 128.9(s) , 128.7(s), 126.9(s), 122.1(s), 120.6(s).

**1-(4-(pyridin-2-yl)phenyl)ethanone (3d, yield 27%):** White solid. m.p. 83-85°C.

<sup>1</sup>H NMR (400 MHz, CDCl<sub>3</sub>, ppm): δ 8.73(d, *J* = 4.8Hz, 1H), 8.10 (d, *J* = 8.5 Hz, 2H), 8.06 (d, *J* = 8.5 Hz, 2H), 7.80 (d, *J* = 4.0 Hz, 2H), 7.3(m, 1H), 2.65 (s, 3H). <sup>13</sup>C NMR (100 MHz, CDCl<sub>3</sub>, ppm): δ 196.8(s), 155.0(s), 148.9(s), 142.5(s), 136.1(s), 135.9(s), 127.8(s), 126.0(s), 121.9(s), 120.0(s), 25.7(s).

**phenyl(4-(pyridin-2-yl)phenyl)methanone (3e, yield 47%):** White solid. m.p. 89-90°C.

<sup>1</sup>H NMR (400 MHz, CDCl<sub>3</sub>, ppm): δ 8.73(d, *J* = 5.0 Hz, 1H), 8.11(d, *J* = 8.5Hz, 2H), 7.91(d, *J* = 8.5 Hz, 2H), 7.81(m, 4H), 7.60(t, *J* = 7.3 Hz, 1H), 7.49(t, *J* = 7.5Hz, 2H) , 7.29(m, 1H). <sup>13</sup>C NMR (100 MHz, CDCl<sub>3</sub>, ppm): δ 196.3(s), 156.2(s), 149.9(s), 143.0(s), 137.6(s), 137.6(s), 136.9(s), 132.5(s), 130.6(s), 130.0(s), 128.3(s), 126.7(s), 122.9(s), 121.0(s).

**2-(4-(trifluoromethyl)phenyl)pyridine (3f, yield 40%):** white solid. m.p. 69-70°C.

<sup>1</sup>H NMR (400 MHz, CDCl<sub>3</sub>, ppm): δ 8.72(d, *J* = 5.0 Hz, 1H), 8.10(d, *J* = 8.4 Hz, 2H), 7.78(m, 2H) , 7.72(d, *J* = 8.4 Hz, 2H) , 7.28(m, 1H). <sup>13</sup>C NMR (100 MHz, CDCl<sub>3</sub>, ppm): δ 155.8(s), 149.9(s), 142.6(s), 136.9(s), 130.9(s), 130.6(s), 127.1(s), 125.6(s),

125.6(s), 122.9(s), 120.8(s).

**methyl 4-(pyridin-2-yl)benzoate (3g, yield 57%):** White solid. m.p. 97-98°C.

<sup>1</sup>H NMR (400 MHz, CDCl<sub>3</sub>, ppm): δ 8.73(d, *J* = 4.2 Hz, 1H), 8.11(dd, *J* = 15.0, 10.1Hz, 4H), 7.79(d, *J* = 3.5 Hz, 2H), 7.28(q, *J* = 4.5 Hz, 1H), 3.94(s, 3H). <sup>13</sup>C NMR  
5 (100 MHz, CDCl<sub>3</sub>, ppm): δ 166.9(s), 156.2(s), 149.9(s), 143.5(s), 136.9(s), 130.3(s), 126.8(s), 122.8(s), 121.0(s), 52.2(s).

**2-(4-nitrophenyl)pyridine (3h, yield 30%):** Yellow solid. m.p. 129-131°C.

<sup>1</sup>H NMR (400 MHz, CDCl<sub>3</sub>, ppm): δ 8.75 (d, *J* = 4.7 Hz, 1H), 8.33(d, *J* = 8.7Hz, 2H), 8.18(d, *J* = 8.7 Hz, 2H), 7.82(m, 2H), 7.34(m, 1H). <sup>13</sup>C NMR (100 MHz, CDCl<sub>3</sub>,  
10 ppm): δ 154.8(s), 150.1(s), 148.1(s), 145.2(s), 137.1(s), 127.6(s), 124.0(s), 123.5(s), 121.2(s).

**2-p-tolylpyridine (3i, yield 50%):** Colorless oil.

<sup>1</sup>H NMR (400 MHz, CDCl<sub>3</sub>, ppm): δ 8.67(d, *J* = 4.8 Hz, 1H), 7.89(d, *J* = 8.4 Hz, 2H), 7.71(dd, *J* = 6.1, 2.2Hz, 2H), 7.28(d, *J* = 8.4 Hz, 2H), 7.19(m, 1H), 2.4(s, 3H). <sup>13</sup>C  
15 NMR (100 MHz, CDCl<sub>3</sub>, ppm): δ 157.4(s), 49.6(s), 138.9(s), 136.6(s), 136.6(s), 129.4(s), 126.7(s), 121.8(s), 120.2(s), 21.2(s).

**2-o-tolylpyridine (3j, yield 48%):** Yellow oil.

<sup>1</sup>H NMR (400 MHz, CDCl<sub>3</sub>, ppm): δ 8.69(d, *J* = 5.0 Hz, 1H), 7.73(td, *J* = 7.7, 1.9Hz, 1H), 7.39(d, *J* = 7.3 Hz, 2H), 7.26(m, 4H), 2.36(s, 3H). <sup>13</sup>C NMR (100 MHz, CDCl<sub>3</sub>,  
20 ppm): δ 160.0(s), 149.2(s), 140.4(s), 136.1(s), 135.7(s), 130.7(s), 129.6(s), 128.2(s), 125.8(s), 124.1(s), 121.6(s), 20.2(s).

**2-(3-methoxyphenyl)pyridine (3l, yield 64%):** Yellow oil.

<sup>1</sup>H NMR (400 MHz, CDCl<sub>3</sub>, ppm): δ 8.69(d, *J* = 4.8 Hz, 1H), 7.72(m, 2H), 7.60(s, 1H), 7.55(d, *J* = 7.7Hz, 1H), 7.38(t, *J* = 8.2Hz, 1H), 7.22(m, 1H), 6.97(dd, *J* = 7.7, 2.4Hz, 1H), 3.89(s, 3H). <sup>13</sup>C NMR (100 MHz, CDCl<sub>3</sub>, ppm): δ 160.0(s), 157.2(s),  
25 149.6(s), 140.9(s), 136.7(s), 129.7(s), 122.2(s), 120.7(s), 119.3(s), 115.0(s), 112.0(s), 55.3(s).

**2-(pyridin-2-yl)benzotrile (3m, yield 42%):** Colorless oil.

<sup>1</sup>H NMR (400 MHz, CDCl<sub>3</sub>, ppm): δ 8.78(d, *J* = 4.1 Hz, 1H), 7.58(m, 2H), 7.78(m, 1H), 7.69(td, *J* = 7.6, 1.4Hz, 1H), 7.51(td, *J* = 7.5, 1.1Hz, 1H), 7.36(m, 1H). <sup>13</sup>C NMR  
30 (100 MHz, CDCl<sub>3</sub>, ppm): δ 155.2(s), 149.9(s), 143.5(s), 136.8(s), 134.1(s), 132.8(s),

129.9(s), 128.7(s), 123.3(s), 123.2(s), 118.7(s), 111.0(s).

**1-(3-(pyridin-2-yl)phenyl)ethanone (3n, yield 36%):** Yellow oil.

<sup>1</sup>H NMR (400 MHz, CDCl<sub>3</sub>, ppm): δ 8.72(d, *J* = 5.1 Hz, 1H), 8.58(s, 1H), 8.22(d, *J* = 6.5 Hz, 1H), 8.01(d, *J* = 7.3 Hz, 1H), 7.79(d, *J* = 4.0 Hz, 2H), 7.58(t, *J* = 7.8 Hz, 1H),  
5 7.28(m, 1H), 2.69(s, 3H). <sup>13</sup>C NMR (100 MHz, CDCl<sub>3</sub>, ppm): δ 198.0(s), 156.4(s),  
149.8(s), 139.9(s), 137.6(s), 136.9(s), 131.4(s), 129.0(s), 128.6(s), 126.8(s), 122.6(s),  
120.6(s), 26.8(s).

**methyl 4-methyl-3-(pyridin-2-yl)benzoate (3o, yield 46%):** colorless oil.

<sup>1</sup>H NMR (400 MHz, CDCl<sub>3</sub>, ppm): δ 8.70(d, *J* = 4.8 Hz, 1H), 8.09(d, *J* = 1.8 Hz, 1H),  
10 7.96(dd, *J* = 8.0, 1.7 Hz, 1H), 7.77(td, *J* = 7.9, 1.8 Hz, 1H), 7.42(d, *J* = 7.9 Hz, 1H),  
7.35(d, *J* = 8.0 Hz, 1H), 7.27(ddd, *J* = 7.4, 4.9, 1.0 Hz, 1H), 3.90(s, 3H), 2.4(s, 3H).  
<sup>13</sup>C NMR (100 MHz, CDCl<sub>3</sub>, ppm): δ 166.9(s), 159.0(s), 149.2(s), 141.5(s), 140.5(s),  
136.3(s), 130.9(s), 130.8(s), 129.2(s), 127.9(s), 124.0(s), 122.0(s), 52.0(s), 20.5(s).  
HRMS (ESI<sup>+</sup>) calcd for C<sub>14</sub>H<sub>14</sub>NO<sub>2</sub> (M + H)<sup>+</sup> 228.1025, found 228.1012.

15 **2-(naphthalen-2-yl)pyridine (3p, yield 78%):** Yellow solid. m.p. 77-79°C.

<sup>1</sup>H NMR (400 MHz, CDCl<sub>3</sub>, ppm): δ 8.75(d, *J* = 4.5 Hz, 1H), 8.49(s, 1H), 8.14(dd, *J* = 8.7, 1.9 Hz, 1H), 7.95(d, *J* = 8.0 Hz, 2H), 7.88(d, *J* = 7.0 Hz, 2H), 7.79(td, *J* = 7.5, 1.8 Hz, 1H), 7.51(q, *J* = 3.2 Hz, 2H), 7.26(m, 1H). <sup>13</sup>C NMR (100 MHz, CDCl<sub>3</sub>, ppm):  
δ 157.3(s), 149.8(s), 136.8(s), 136.6(s), 133.6(s), 133.5(s), 128.7(s), 127.6(s), 126.5(s),  
20 126.3(s), 126.3(s), 124.5(s), 122.1(s), 120.8(s).

**2-(naphthalen-1-yl)pyridine (3q, yield 66%):** Yellow oil.

<sup>1</sup>H NMR (400 MHz, CDCl<sub>3</sub>, ppm): δ 8.80(d, *J* = 4.0 Hz, 1H), 8.01(d, *J* = 7.6 Hz, 1H),  
7.92(d, *J* = 8.2 Hz, 2H), 7.82(td, *J* = 8.0, 1.7 Hz, 1H), 7.59(m, 3H), 7.49(m, 2H),  
7.33(m, 1H). <sup>13</sup>C NMR (100 MHz, CDCl<sub>3</sub>, ppm): δ 159.2(s), 149.5(s), 138.5(s),  
25 136.4(s), 133.9(s), 131.1(s), 128.9(s), 128.3(s), 127.4(s), 126.4(s), 125.8(s), 125.6(s),  
125.3(s), 125.0(s), 122.0(s).

**2,2'-bipyridine (3r, yield 46%):** White solid. m.p. 68-70°C.

<sup>1</sup>H NMR (400 MHz, CDCl<sub>3</sub>, ppm): δ 8.67(s, 2H), 8.39(d, *J* = 8.2 Hz, 2H), 7.80(td, *J* = 7.8, 1.7 Hz, 2H), 7.29(m, 2H). <sup>13</sup>C NMR (100 MHz, CDCl<sub>3</sub>, ppm): δ 156.1(s),  
30 149.1(s), 136.9(s), 123.7(s), 121.0(s).

**2,3'-bipyridine (3s, yield 35%):** colorless oil.

<sup>1</sup>H NMR (400 MHz, CDCl<sub>3</sub>, ppm): δ 9.33(s, 1H), 8.70(m, 2H), 8.46(d, *J* = 7.9 Hz, 1H), 8.02(d, *J* = 7.9 Hz, 1H), 7.94(td, *J* = 7.6, 1.8 Hz, 1H), 7.53(m, 1H), 7.41(ddd, *J* = 7.6, 4.7, 1.1 Hz, 1H). <sup>13</sup>C NMR (100 MHz, CDCl<sub>3</sub>, ppm): δ 155.3(s), 150.8(s), 150.6(s), 148.8(s), 138.1(s), 134.8(s), 124.0(s), 121.4(s).

5 **2,4'-bipyridine (3t)**, yield 45%): white solid. m.p. 59-60°C.

<sup>1</sup>H NMR (400 MHz, CDCl<sub>3</sub>, ppm): δ 8.75(m, 3H), 8.09(d, *J* = 7.7 Hz, 3H), 7.97(td, *J* = 7.4, 1.9 Hz, 1H), 7.48(ddd, *J* = 7.6, 4.7, 0.9 Hz, 1H). <sup>13</sup>C NMR (100 MHz, CDCl<sub>3</sub>, ppm): δ 154.9(s), 151.1(s), 150.9(s), 147.0(s), 138.3(s), 125.0(s), 121.8(s).

**2-(pyridin-2-yl)quinoline (3u)**, yield 46%): Yellow solid. m.p. 96-97°C.

10 <sup>1</sup>H NMR (400 MHz, CDCl<sub>3</sub>, ppm): δ 8.74(d, *J* = 4.5Hz, 1H), 8.65(d, *J* = 7.9 Hz, 1H), 8.56(d, *J* = 8.7Hz, 1H), 8.28(d, *J* = 8.6Hz, 1H), 8.18(d, *J* = 8.4Hz, 1H), 7.87(m, 2H), 7.74(m, 1H), 7.55(t, *J* = 7.3Hz, 1H), 7.36(ddd, *J* = 7.2, 4.7, 1.0Hz, 1H). <sup>13</sup>C NMR (100 MHz, CDCl<sub>3</sub>, ppm): δ 156.3(s), 156.1(s), 149.1(s), 147.9(s), 136.9(s), 136.8(s), 129.8(s), 129.5(s), 128.2(s), 127.6(s), 126.7(s), 124.0(s), 121.8(s), 118.9(s).

15 **3-(pyridin-2-yl)quinoline (3v)**, yield 59%): Yellow solid. m.p. 97-99°C.

<sup>1</sup>H NMR (400 MHz, CDCl<sub>3</sub>, ppm): δ 9.53(s, 1H), 8.76(s, 2H), 8.14(d, *J* = 8.5 Hz, 1H), 7.9(m, 2H), 7.82(td, *J* = 8.0, 1.7Hz, 1H), 7.73(t, *J* = 7.89 Hz, 1H), 7.57(t, *J* = 7.4 Hz, 1H), 7.30(ddd, *J* = 7.5, 4.8, 1.1Hz, 1H). <sup>13</sup>C NMR (100 MHz, CDCl<sub>3</sub>, ppm): δ 154.8(s), 150.1(s), 149.2(s), 148.2(s), 137.0(s), 133.8(s), 129.9(s), 129.2(s), 128.5(s),

20 127.0(s), 122.8(s), 120.8(s).

25

30

### The NMR spectra.

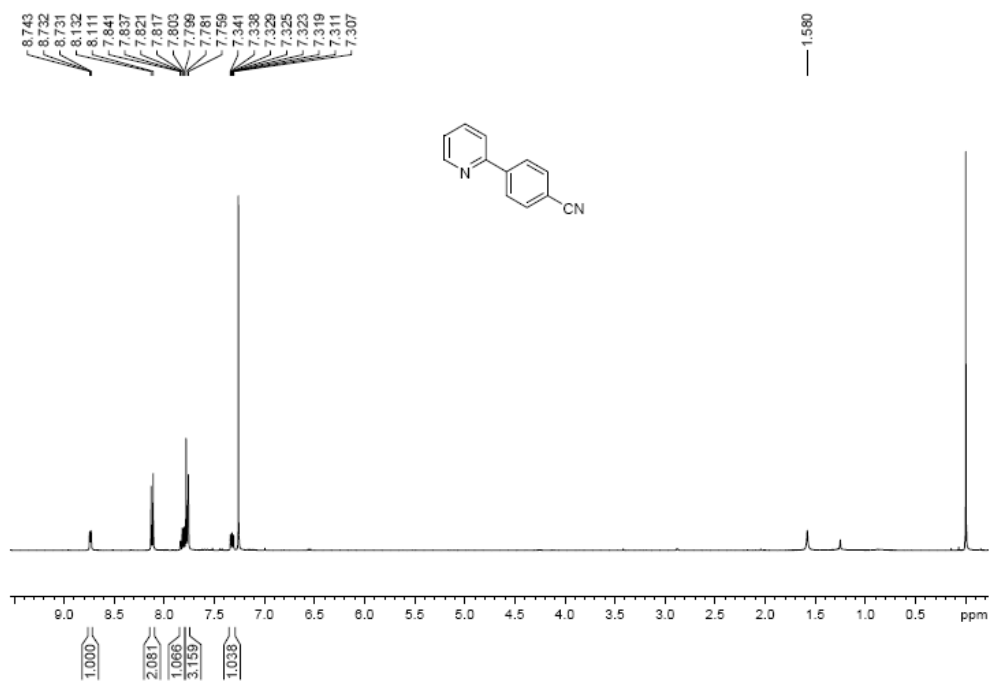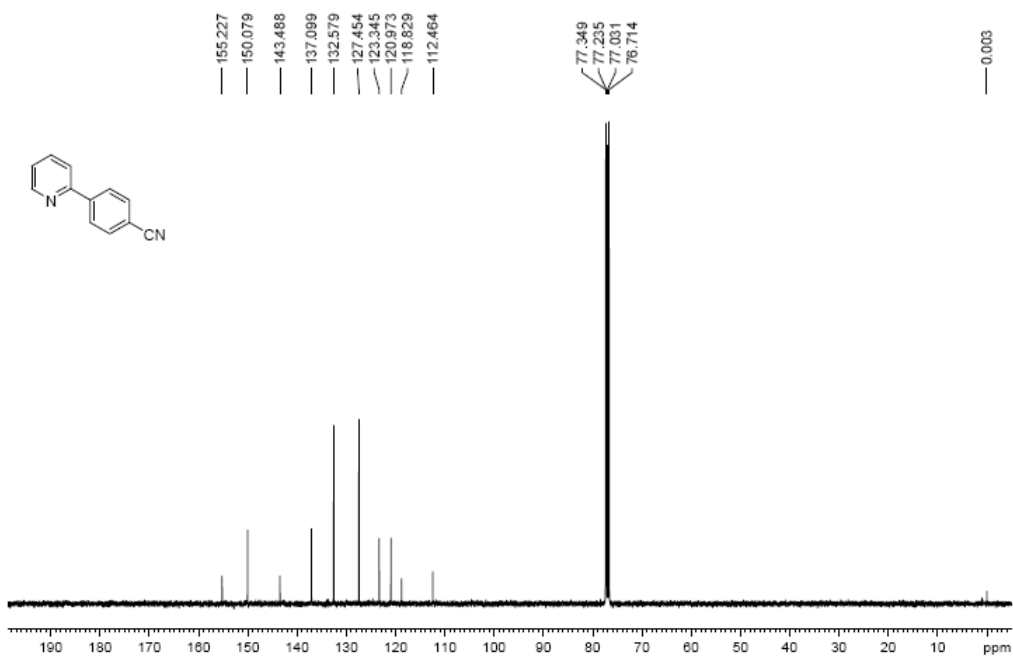

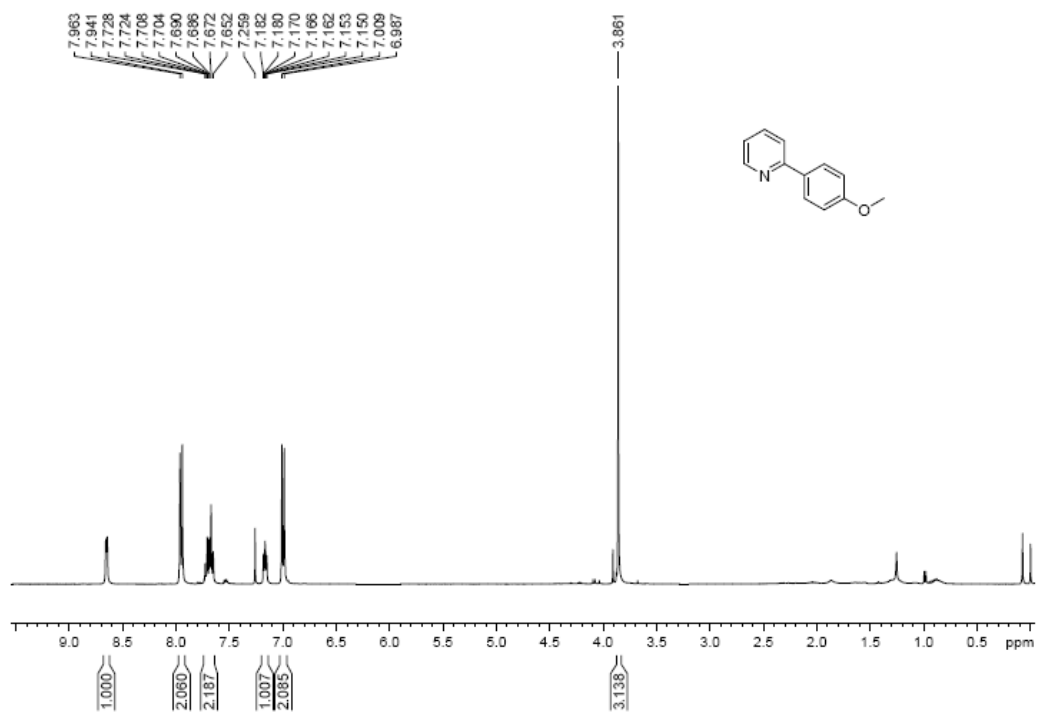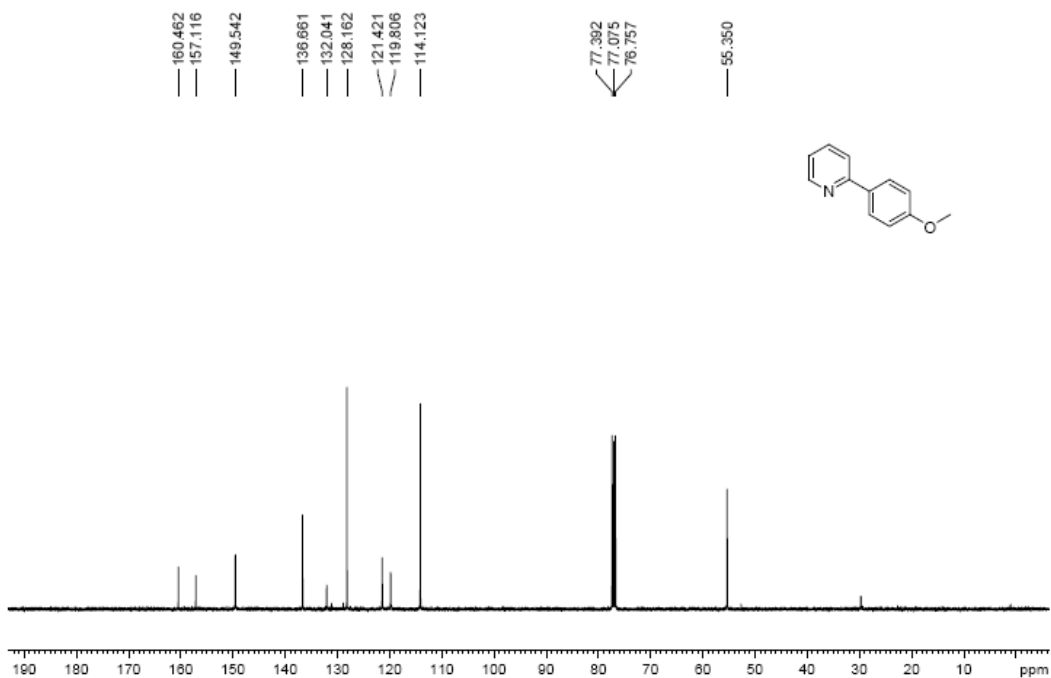



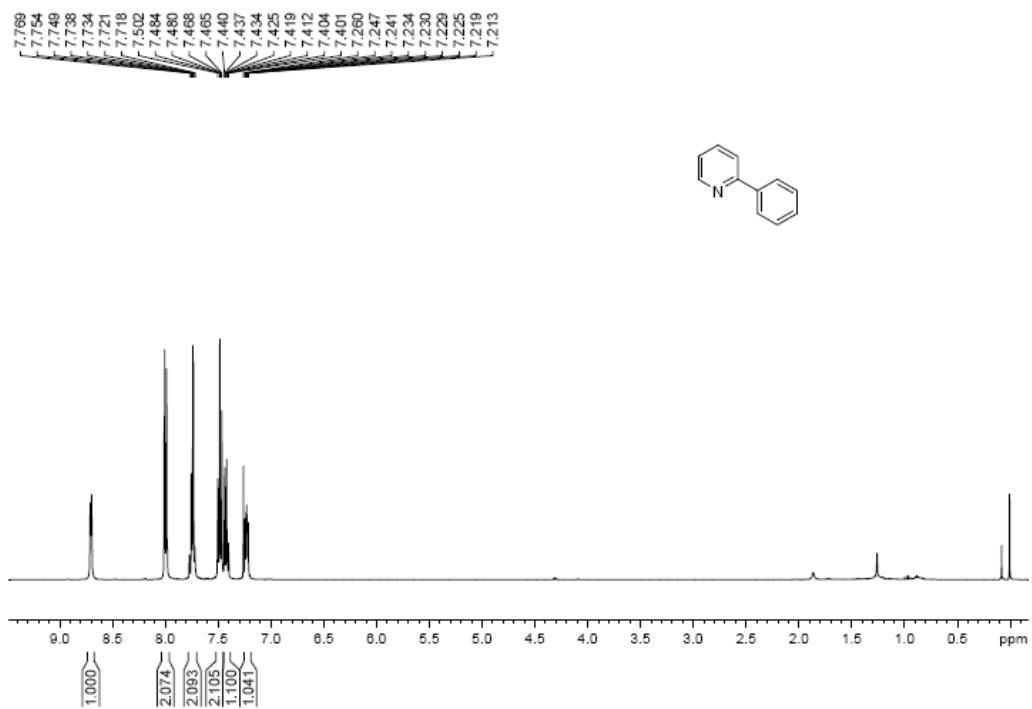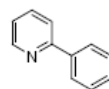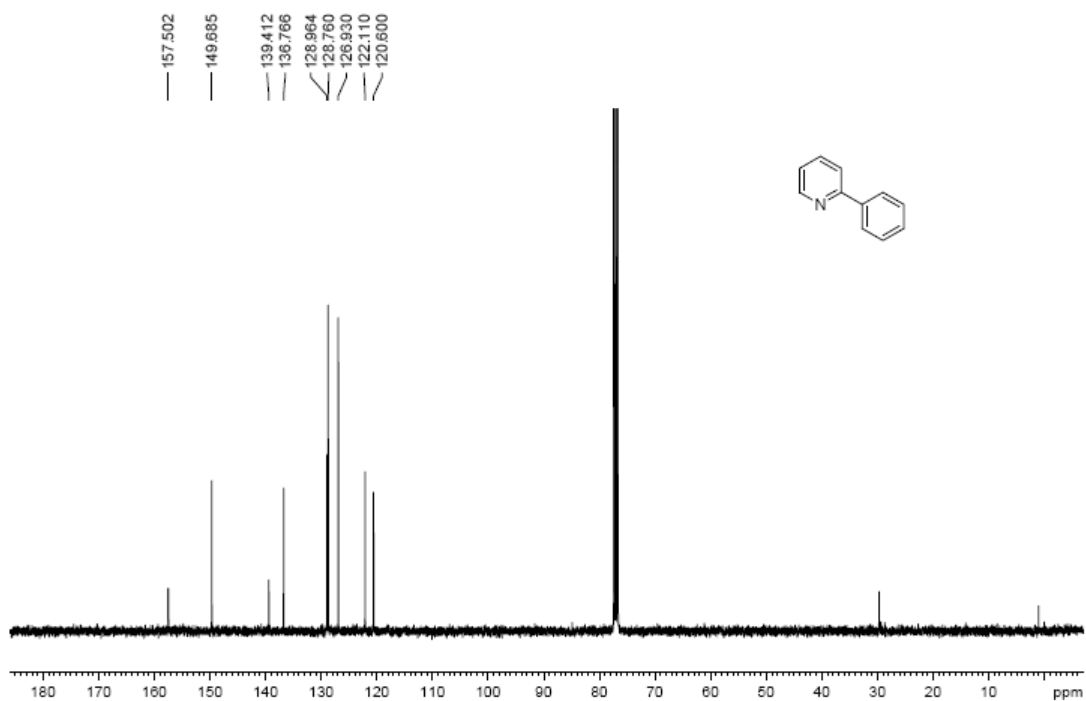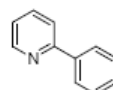

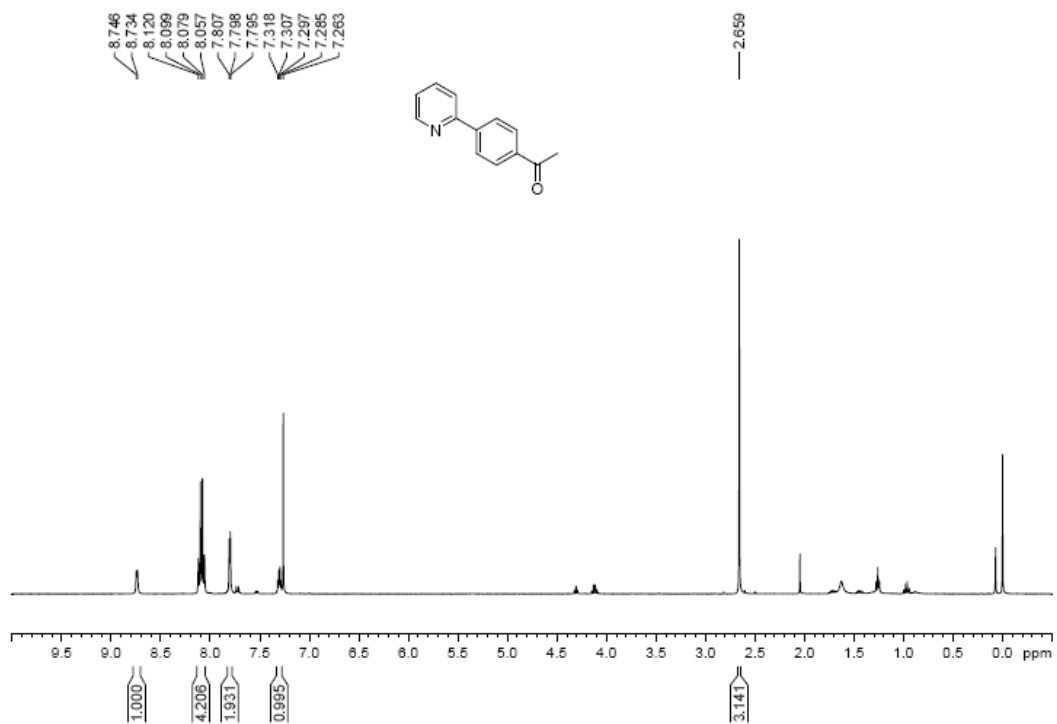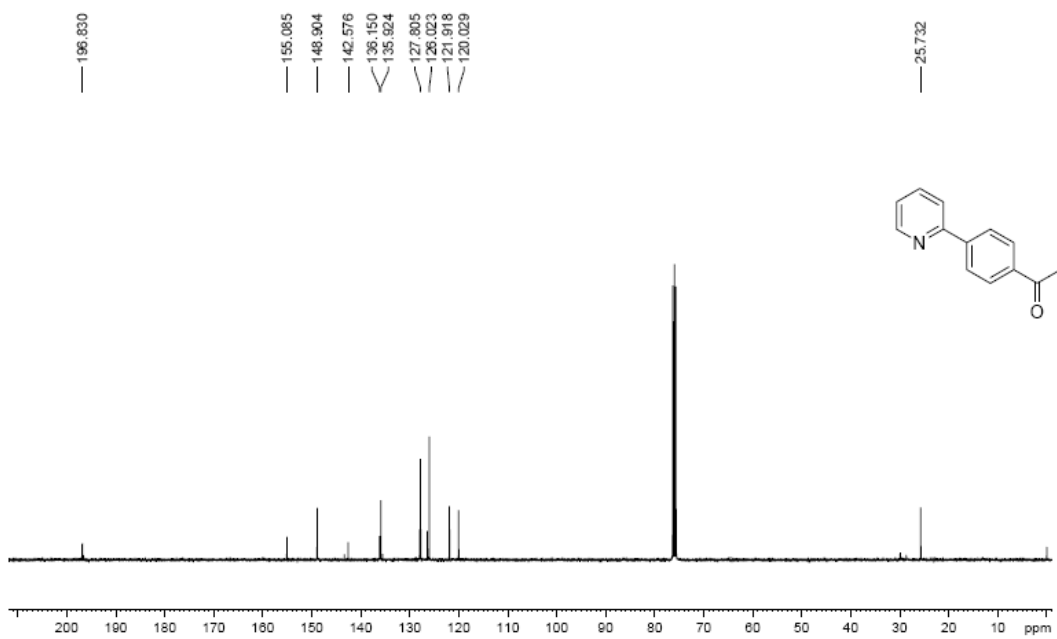

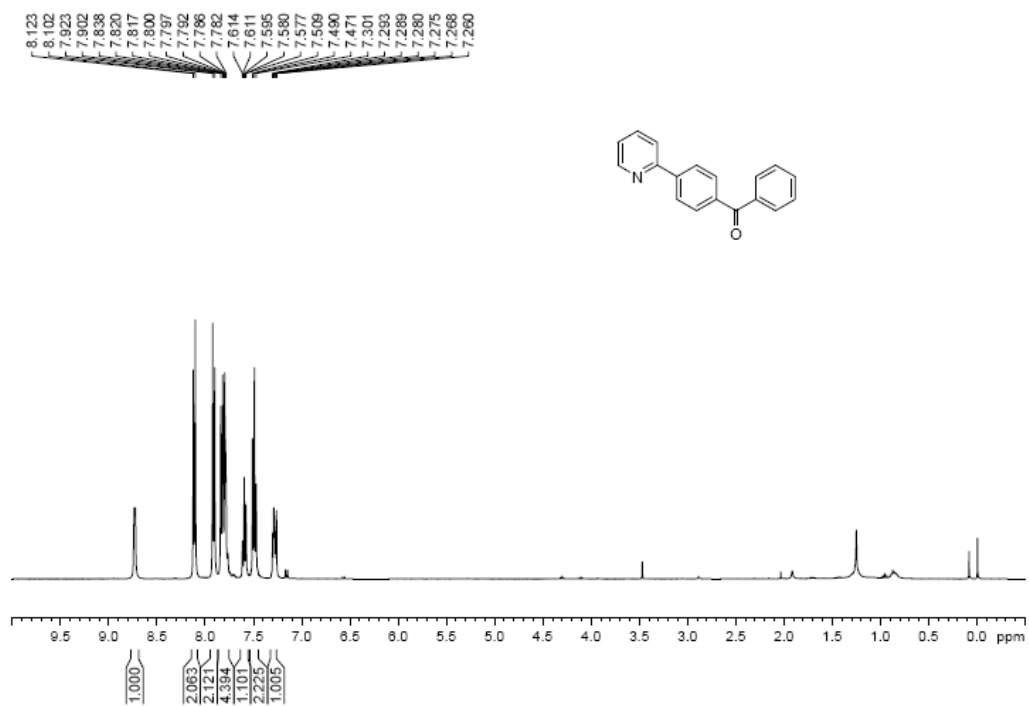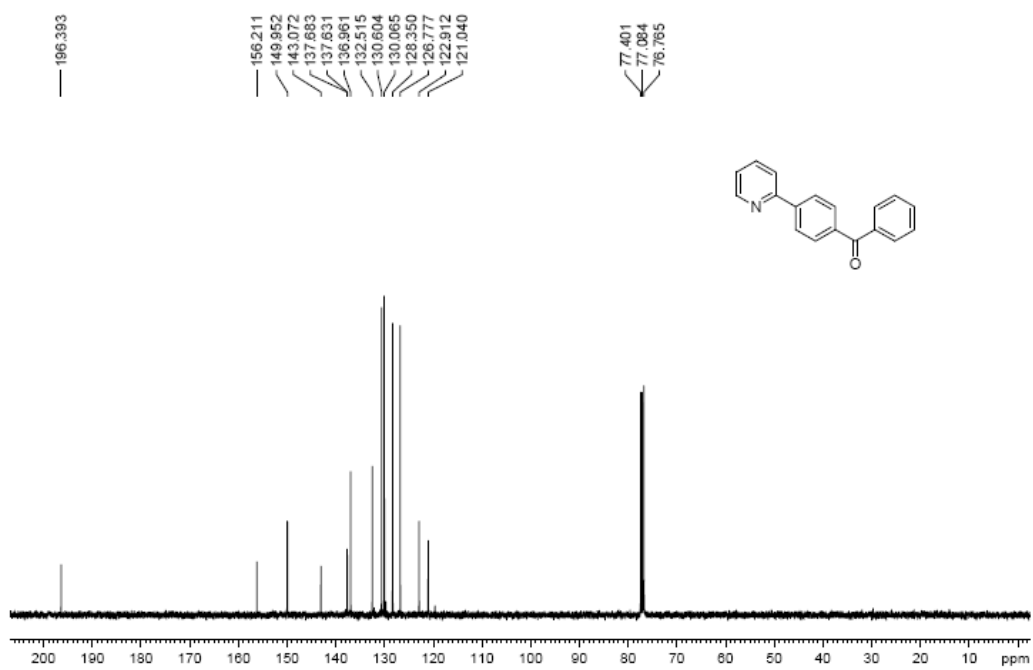

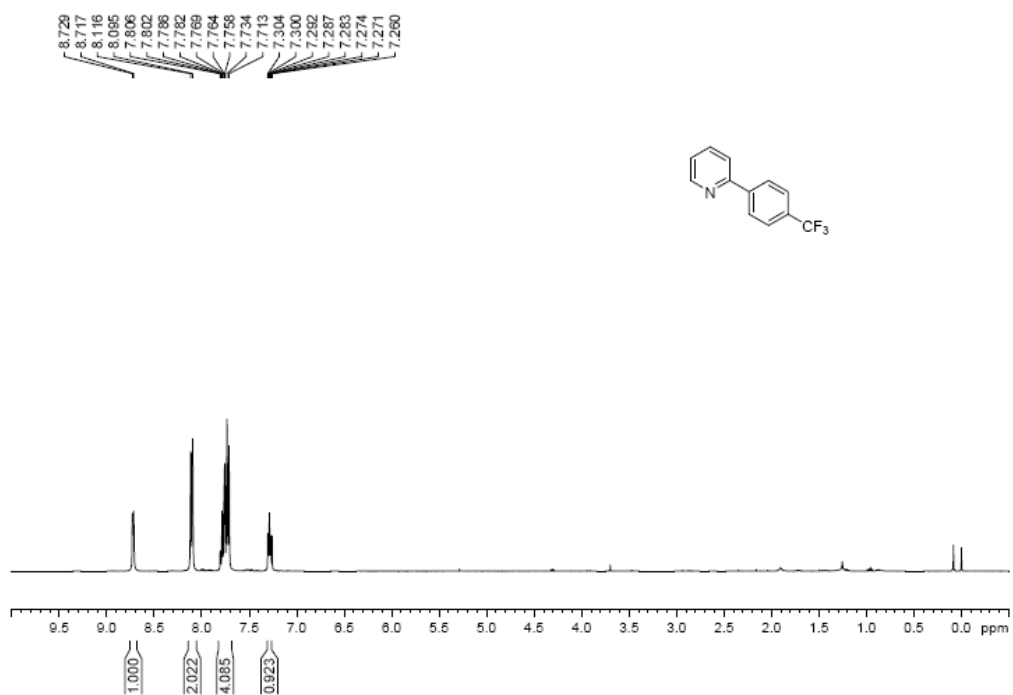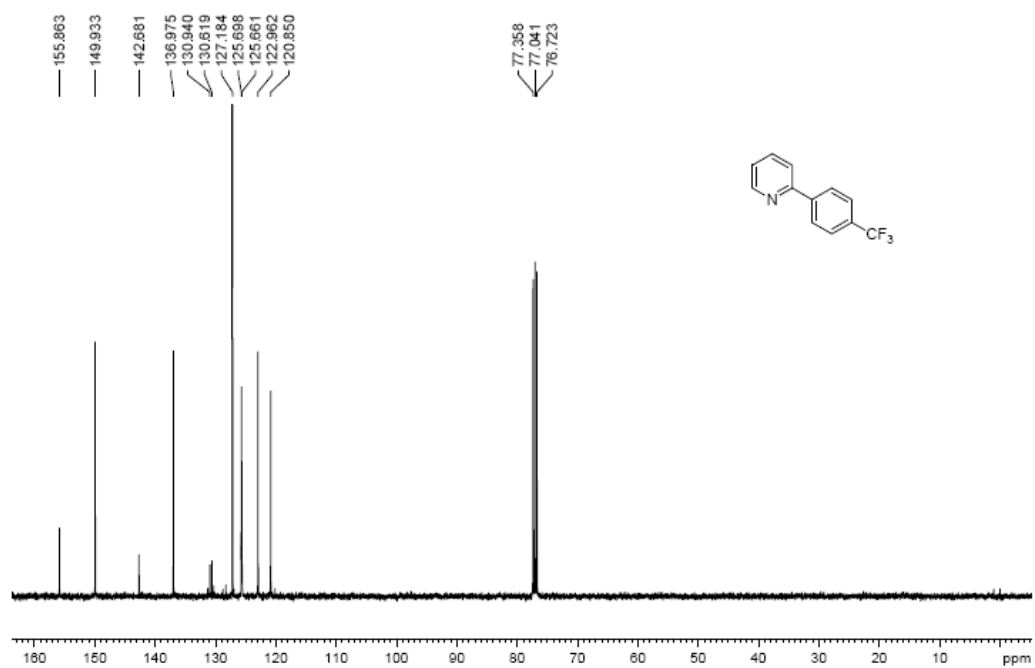

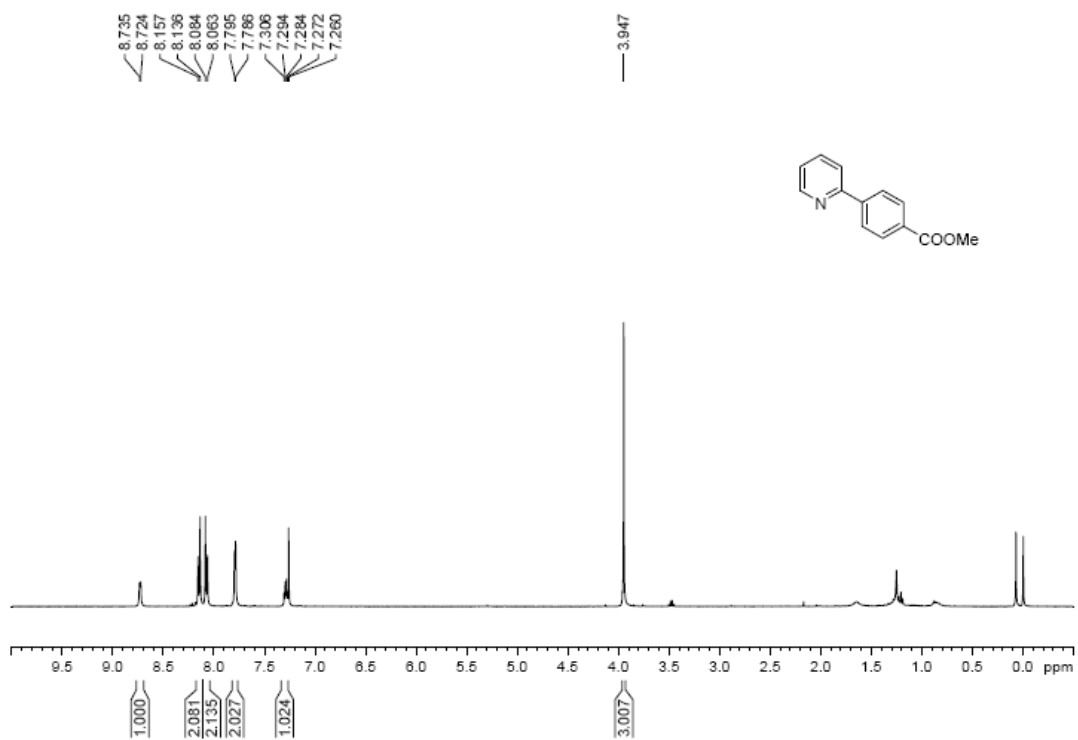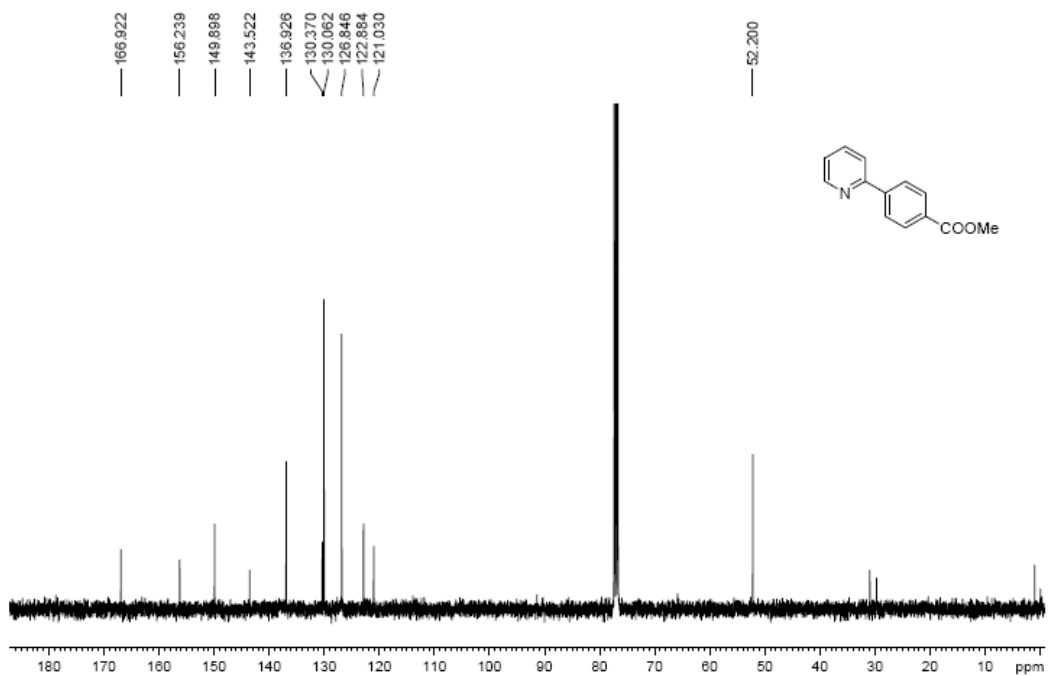

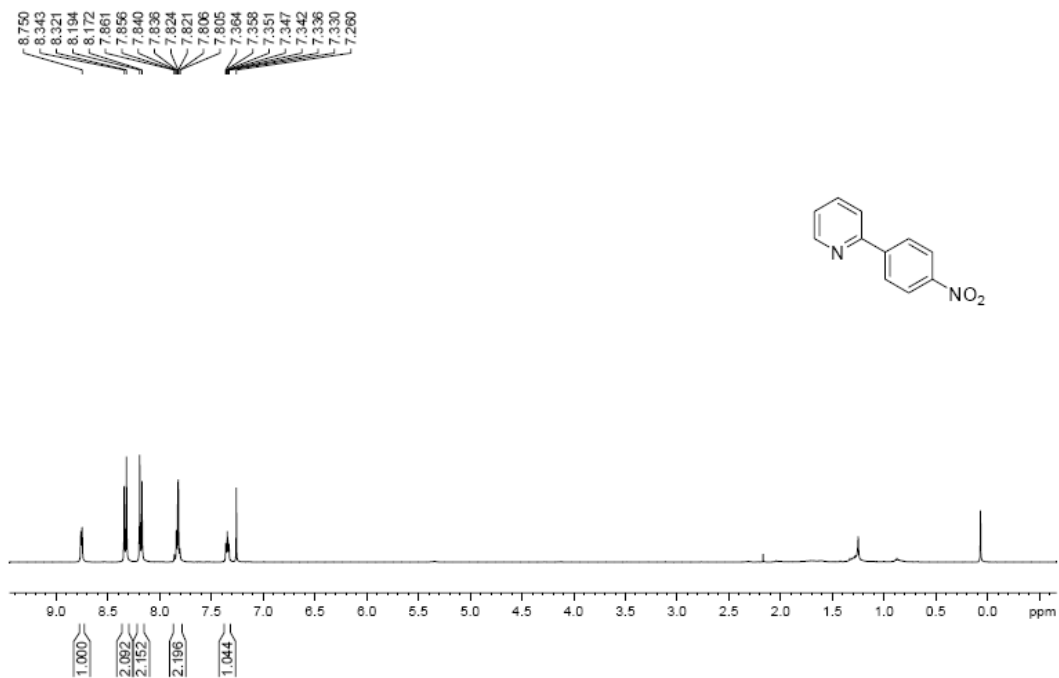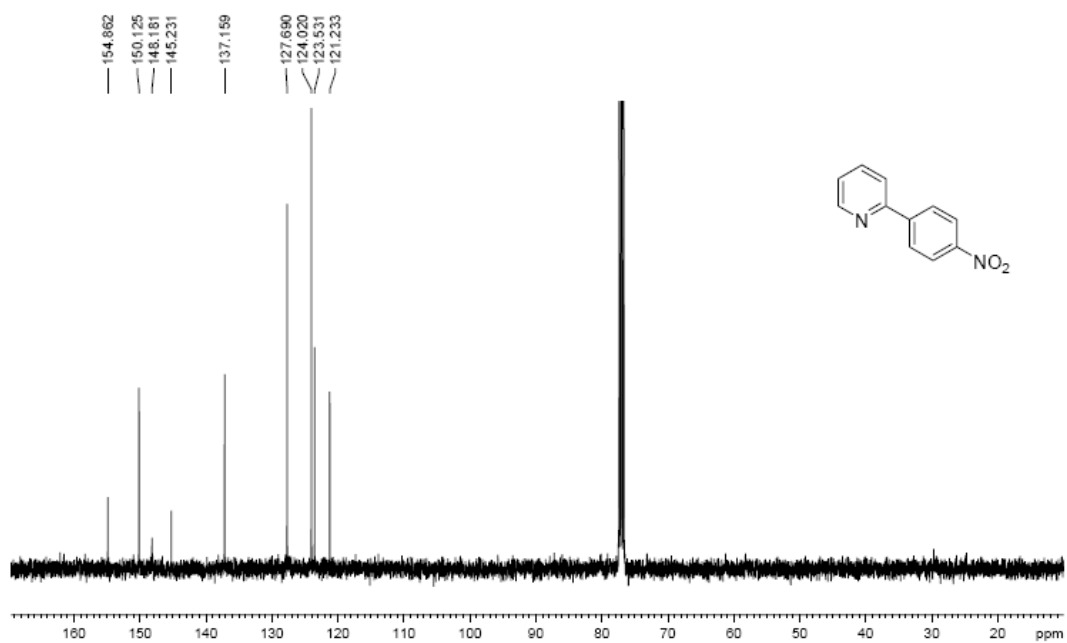

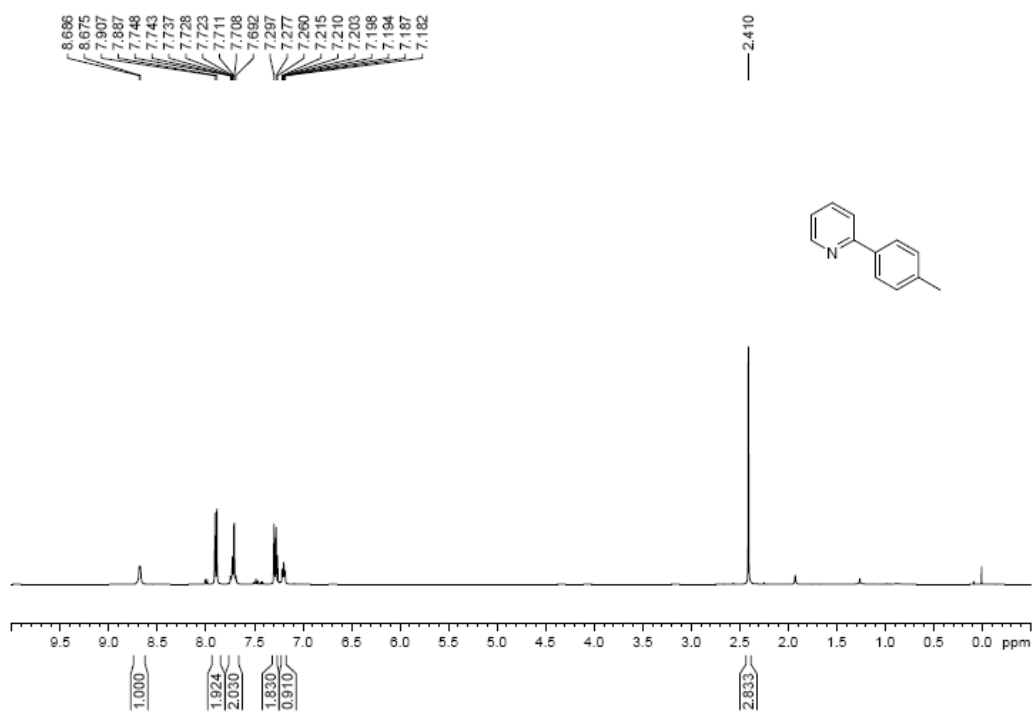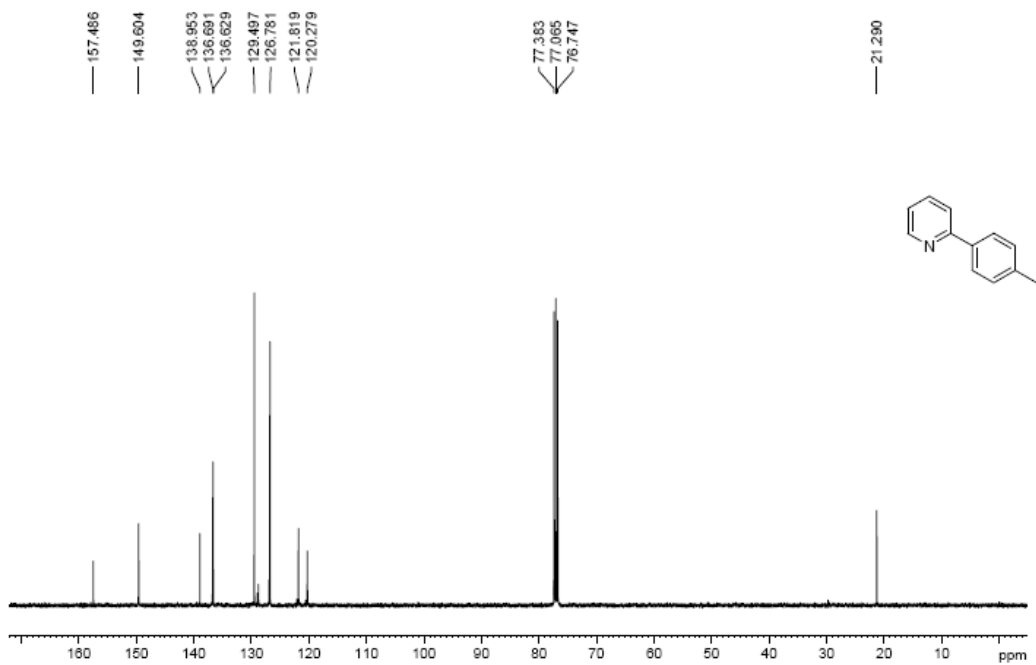

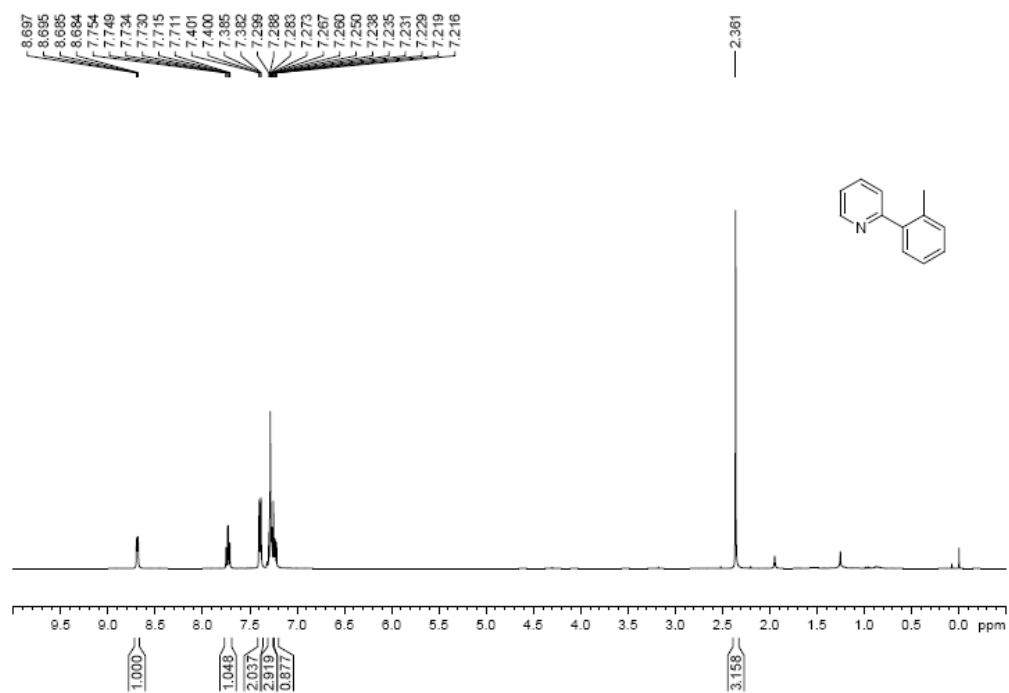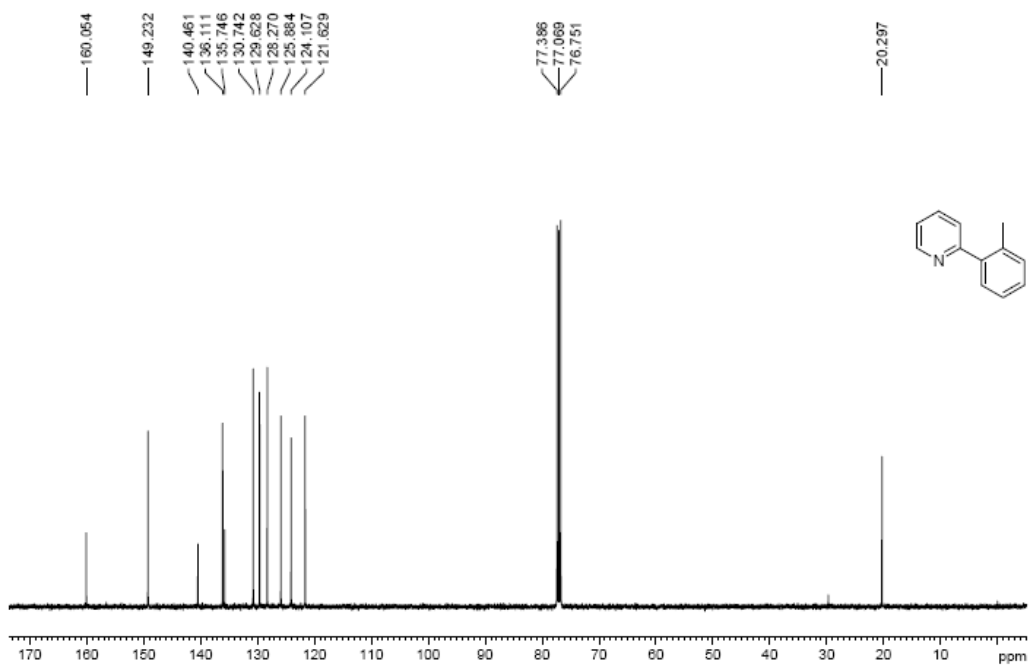



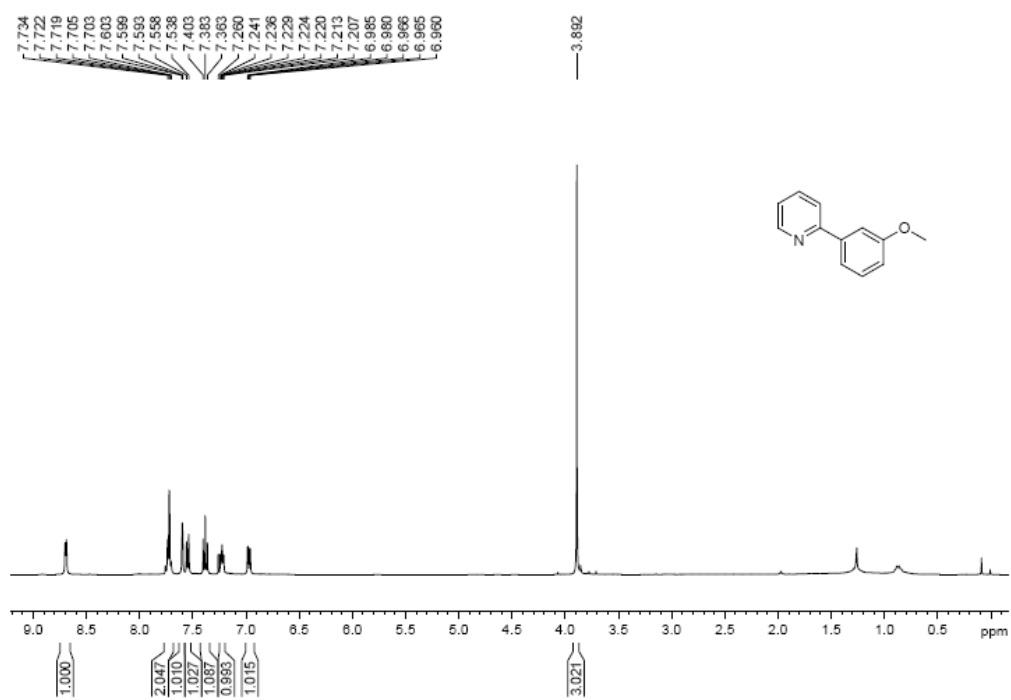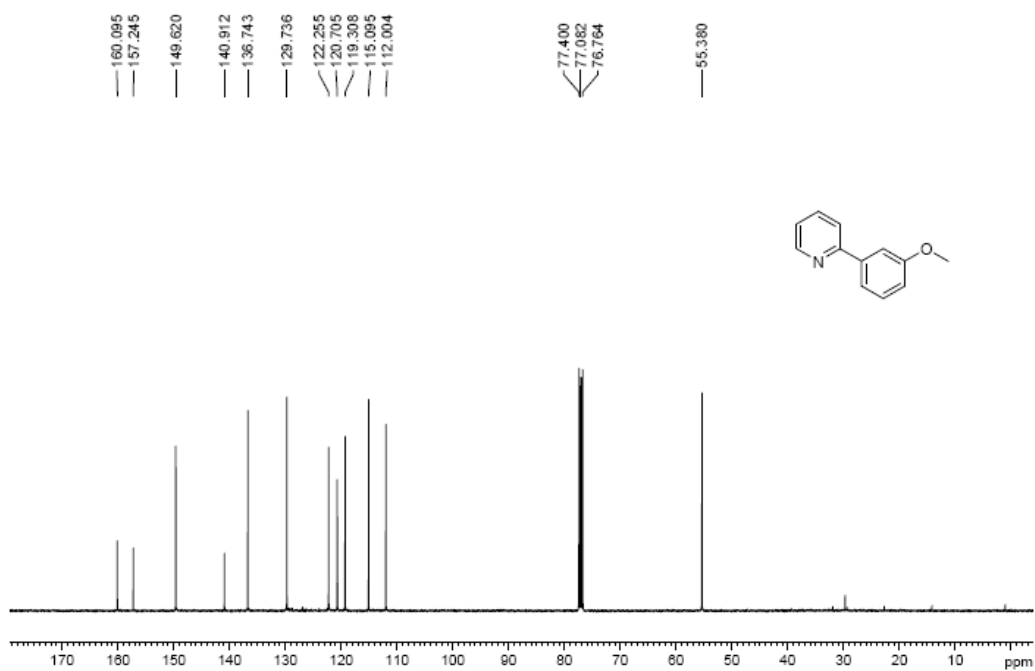

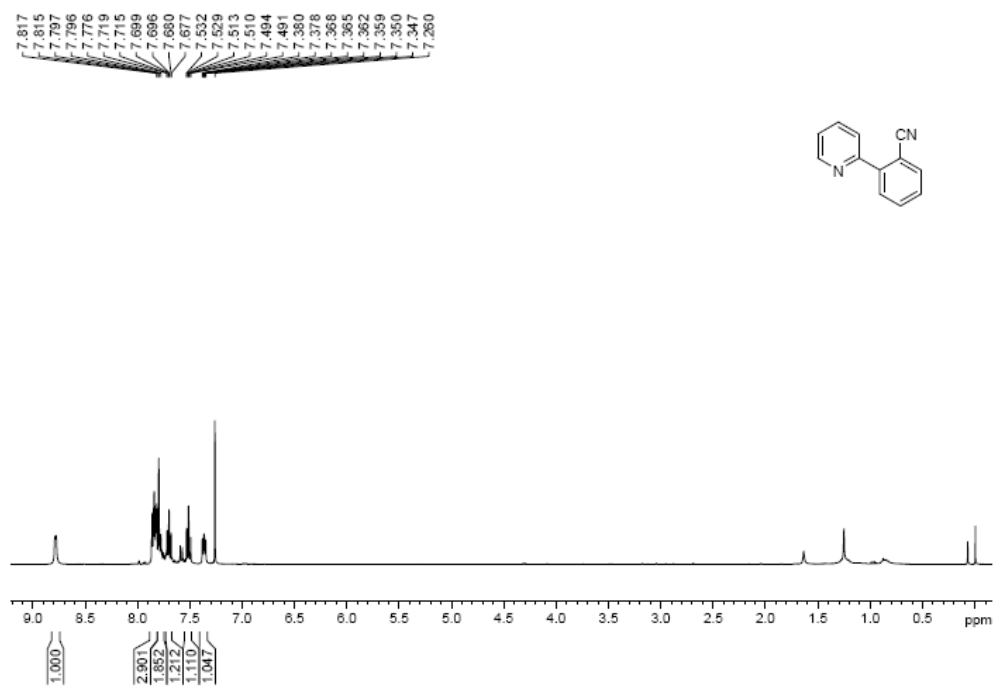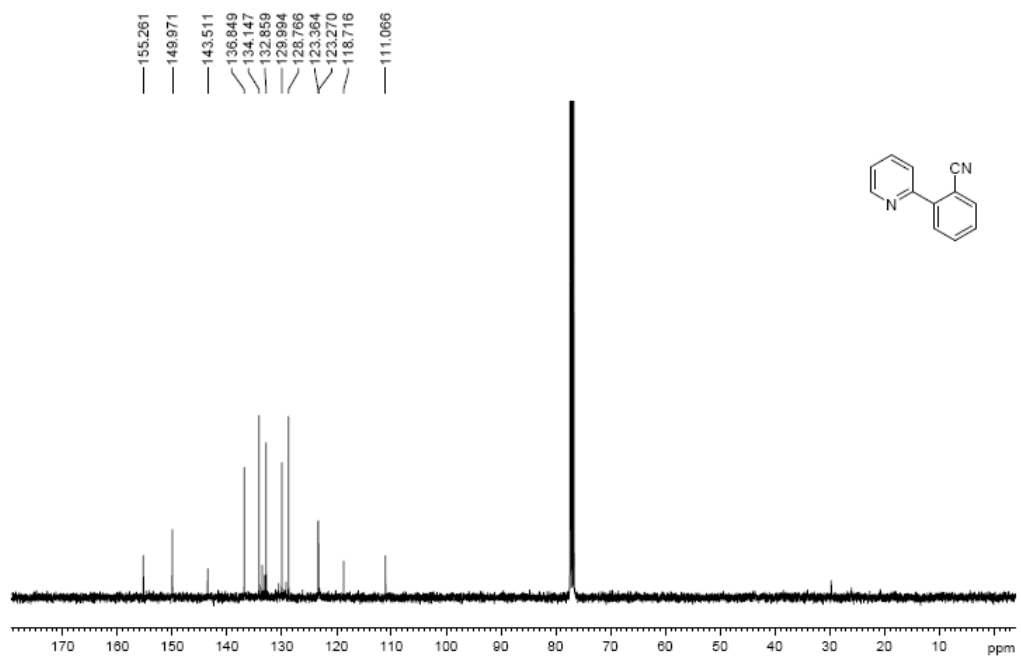

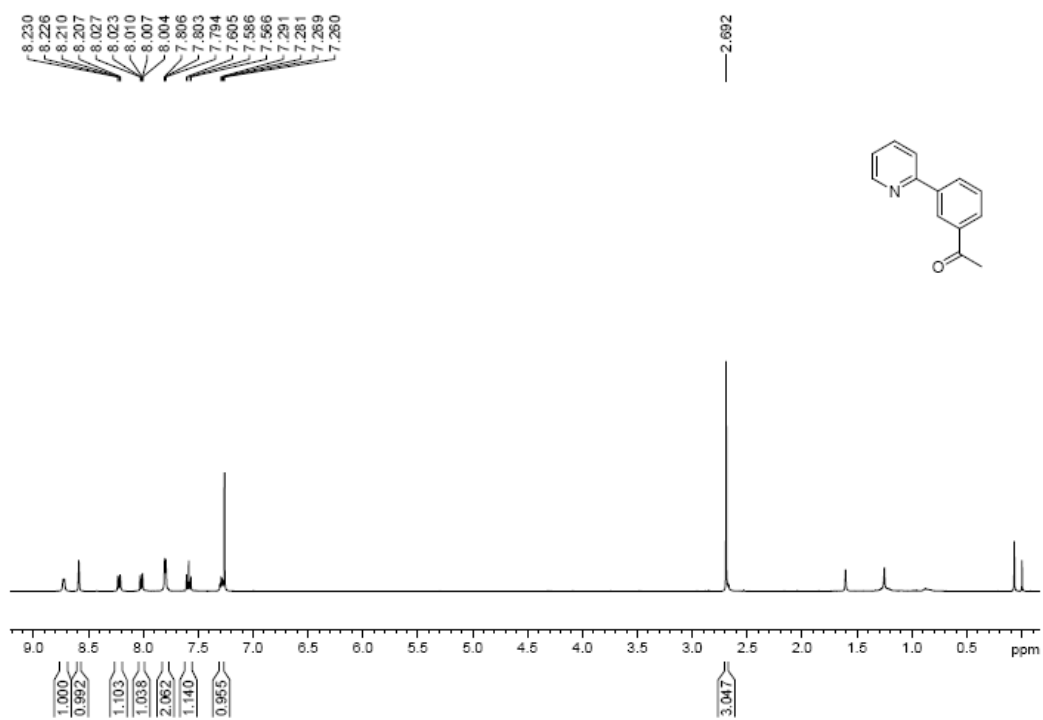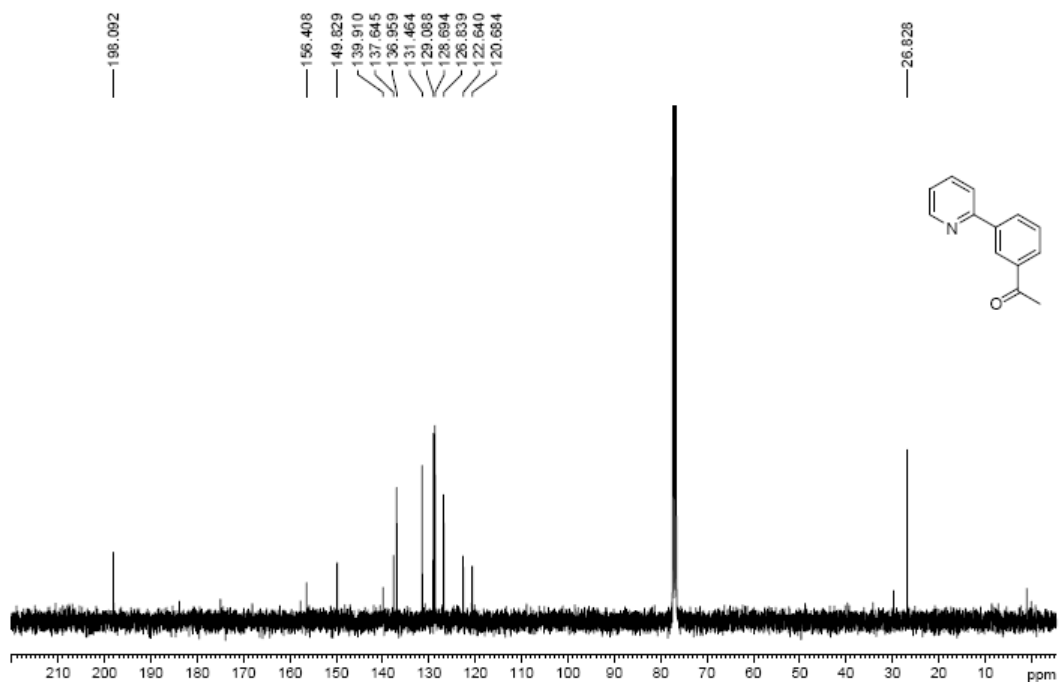

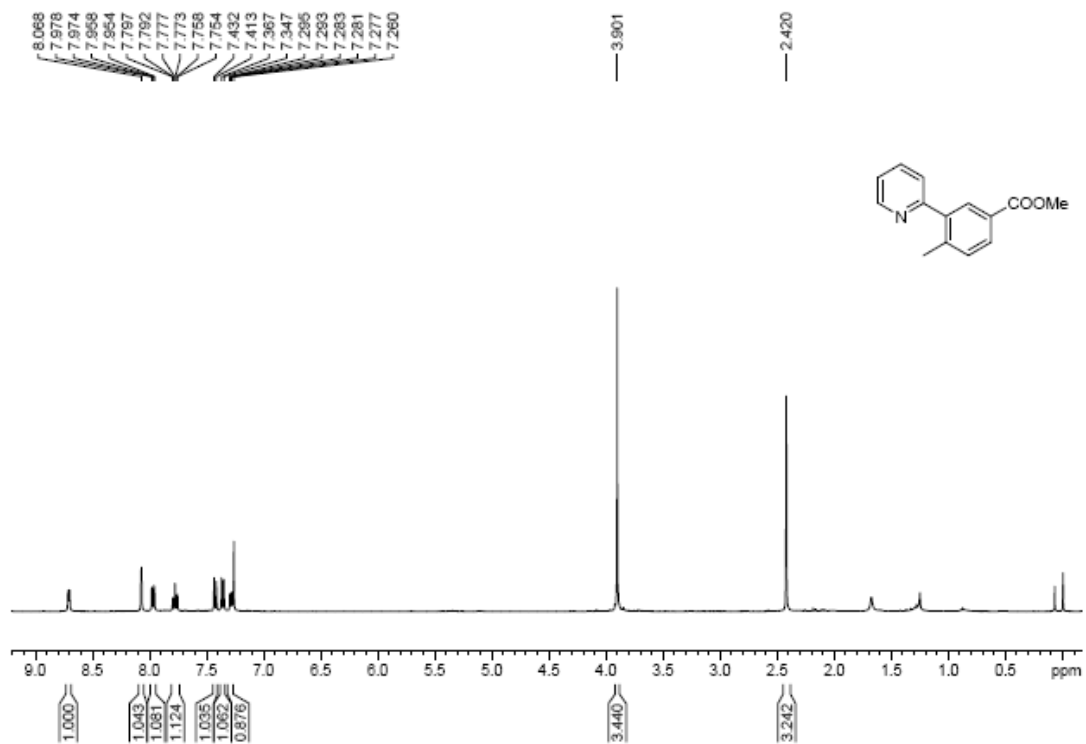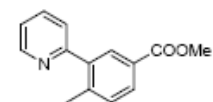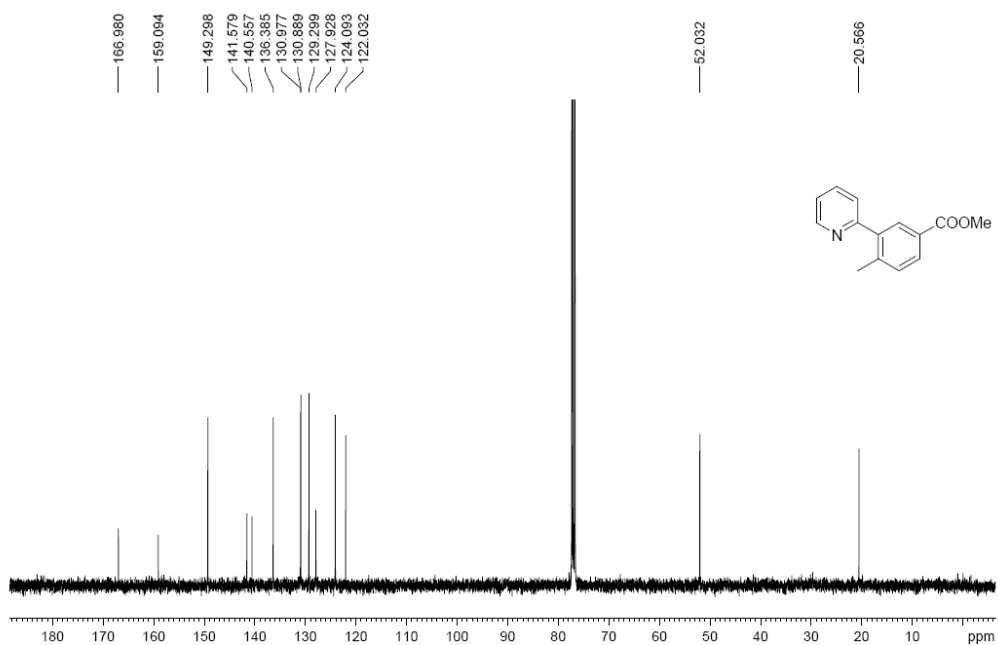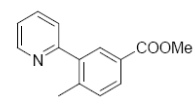

|               |             |             |        |                 |              |                        |                     |
|---------------|-------------|-------------|--------|-----------------|--------------|------------------------|---------------------|
| Sample Name   | zoudapeng   | Position    | PI-97  | Instrument Name | Instrument 1 | User Name              | Agilent FSE         |
| Inj Vol       | 0.2         | InjPosition |        | Sample Type     | Sample       | IRM Calibration Status | All Ions Missed     |
| Data Filename | lxj-0.2uL.d | ACQ Method  | test.m | Comment         |              | Acquired Time          | 4/6/12 Fri 16:42:56 |

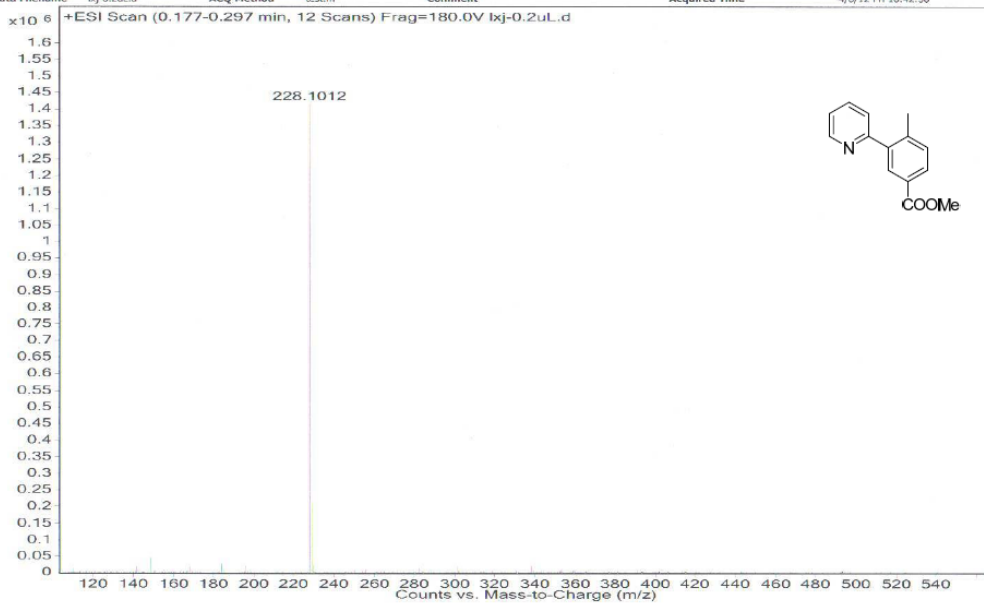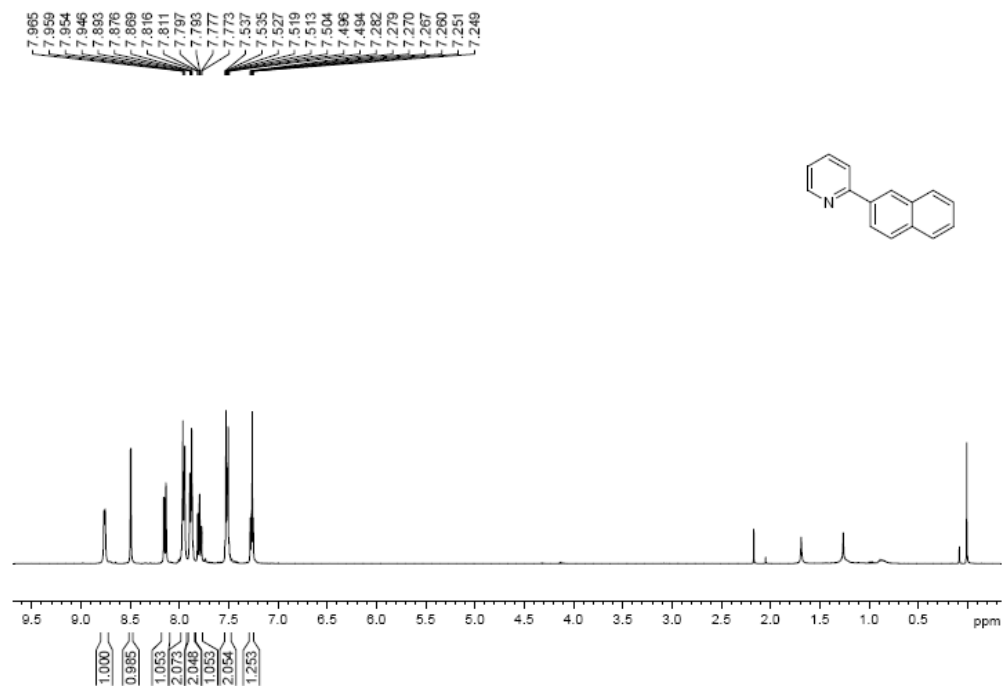

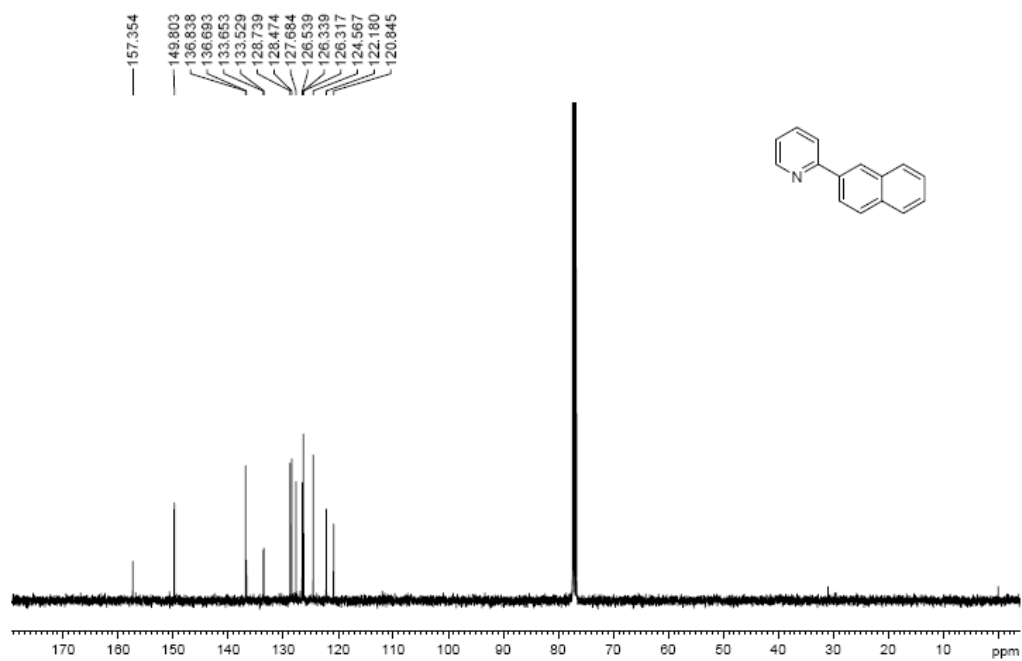

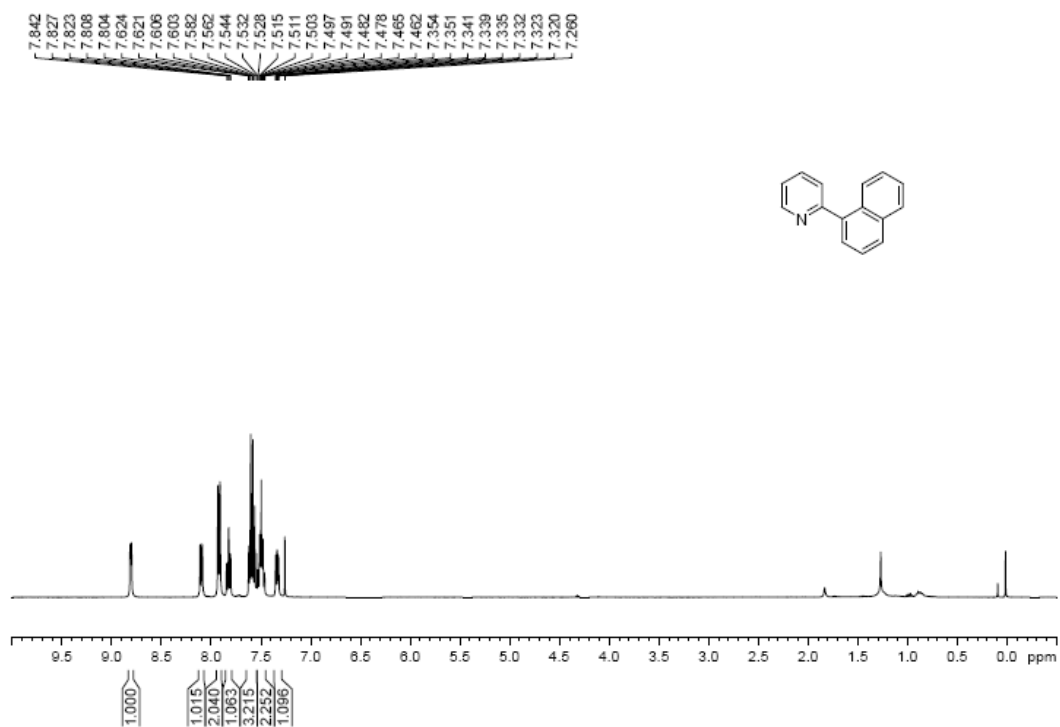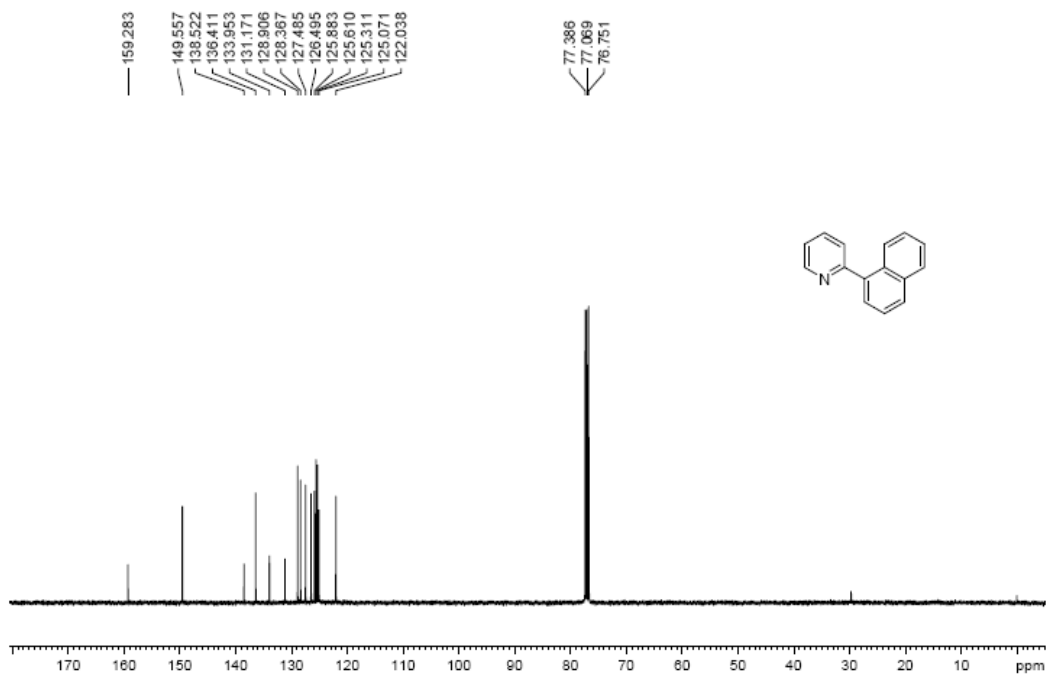

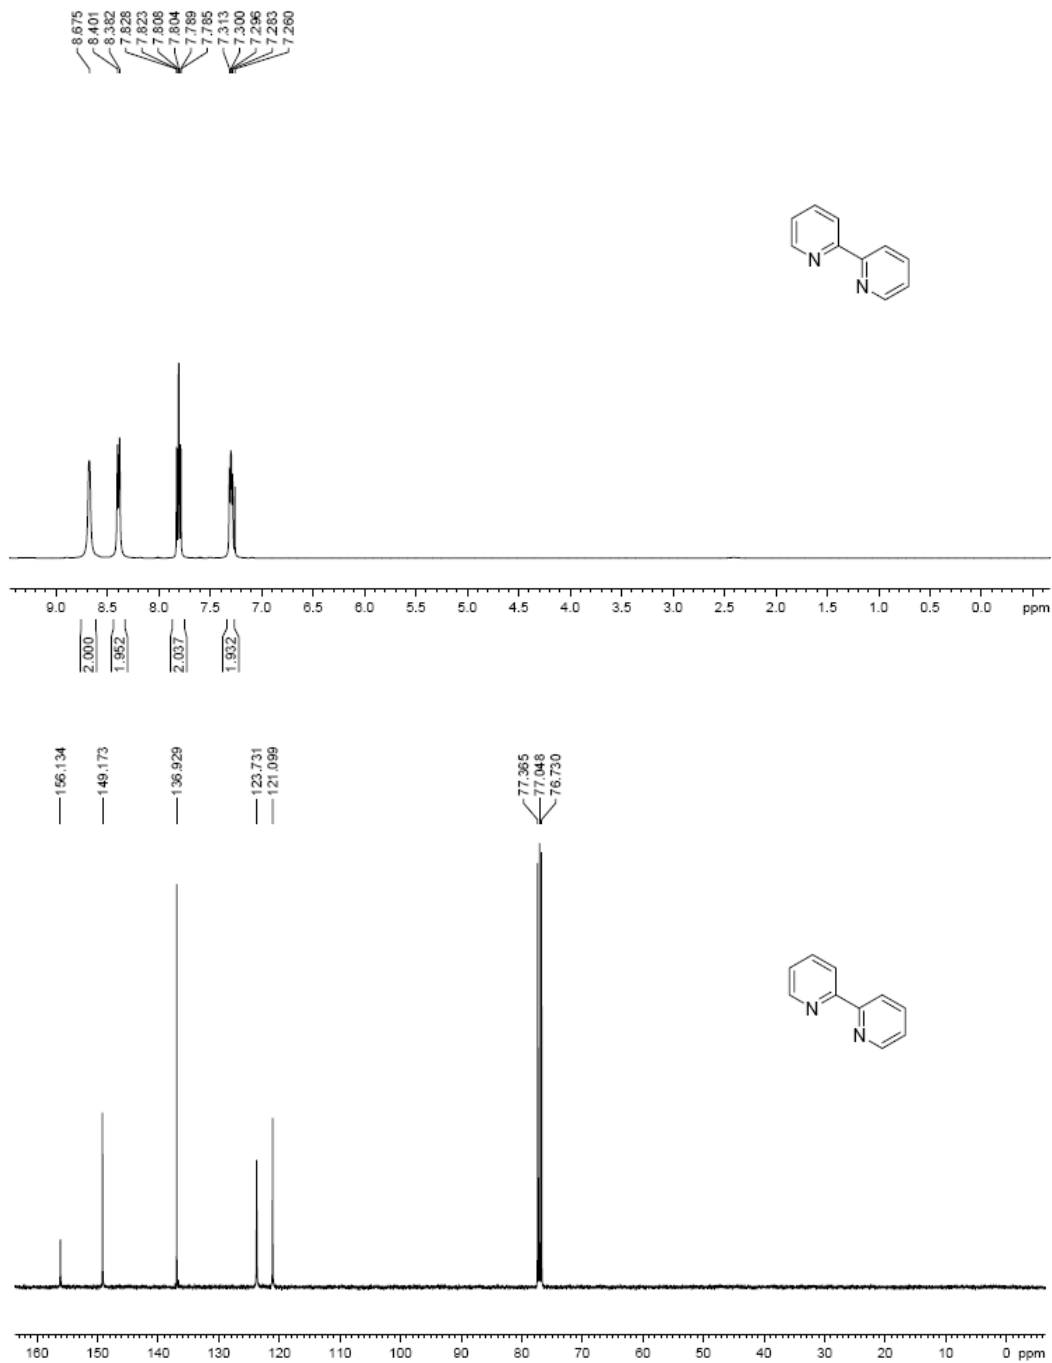



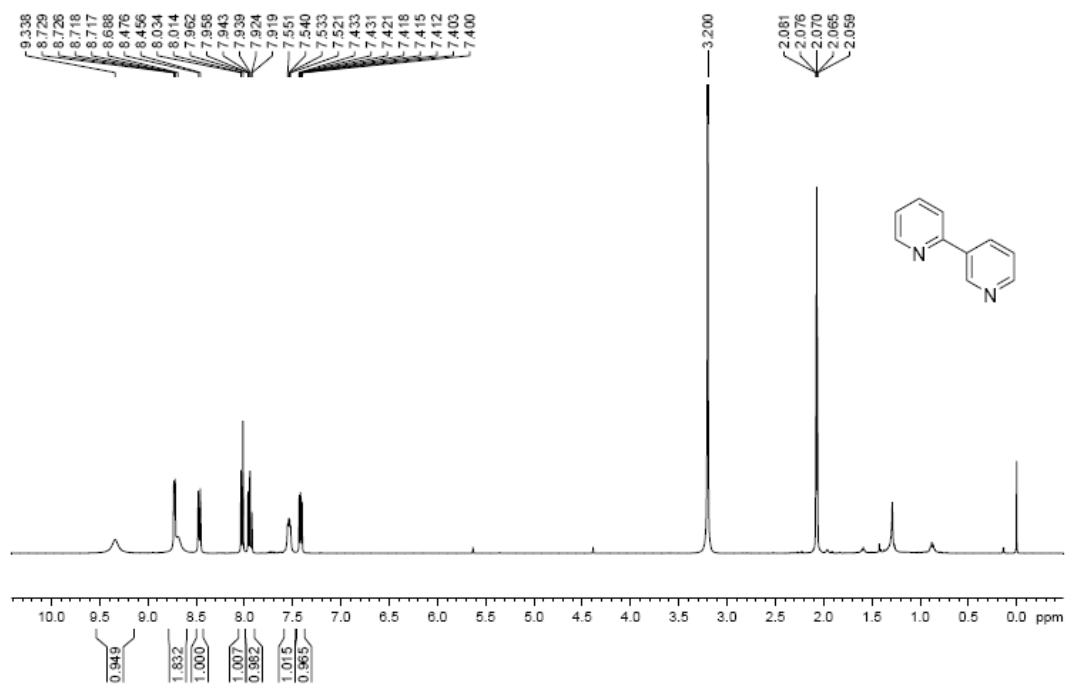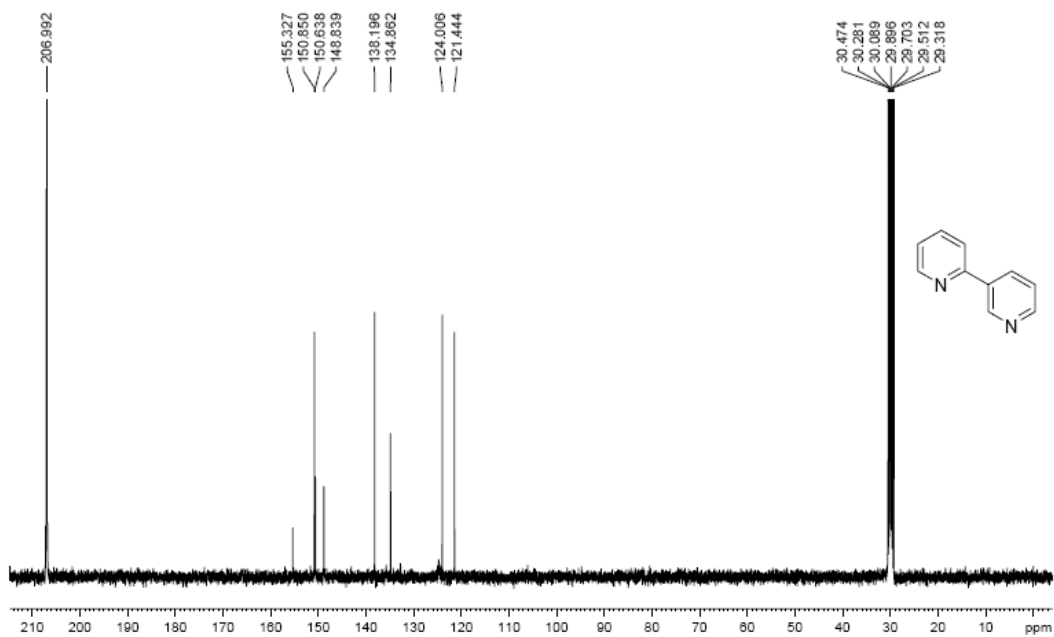

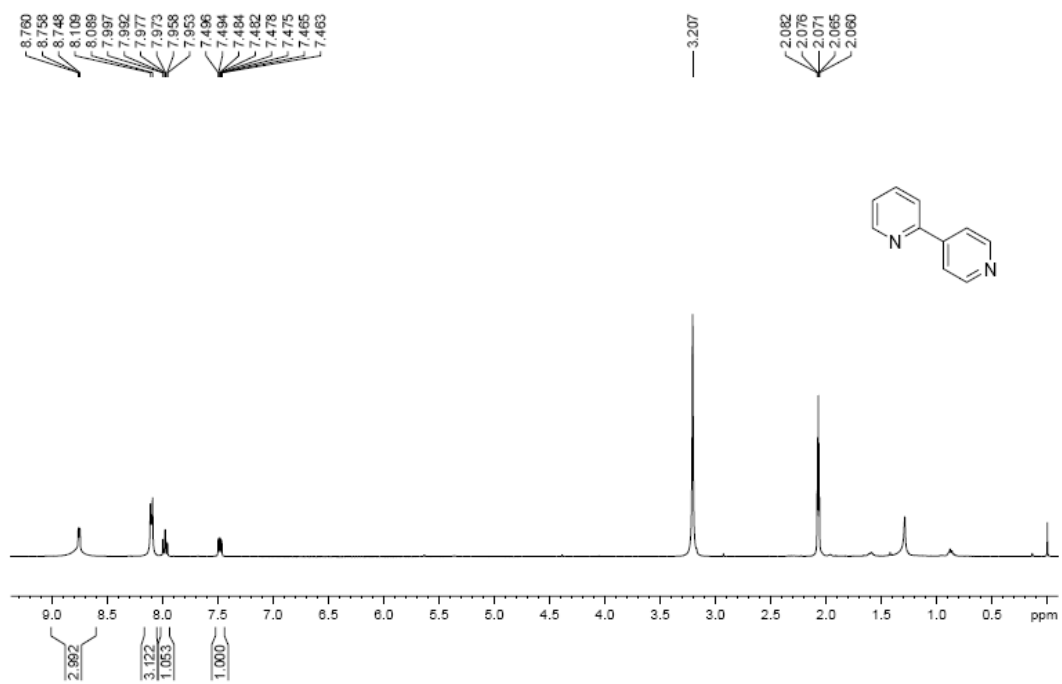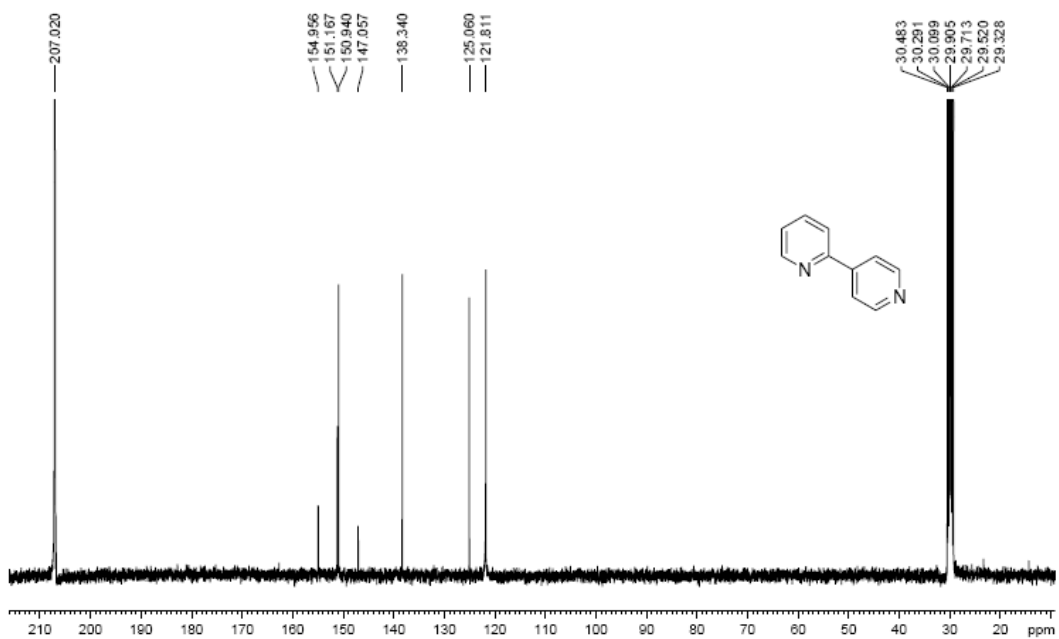

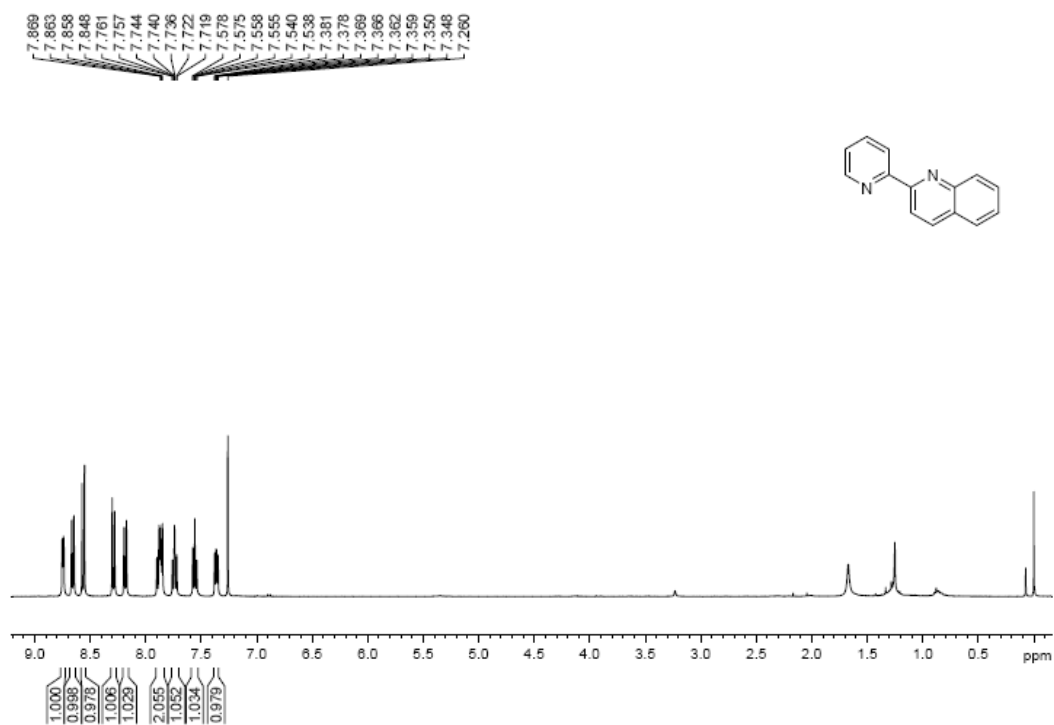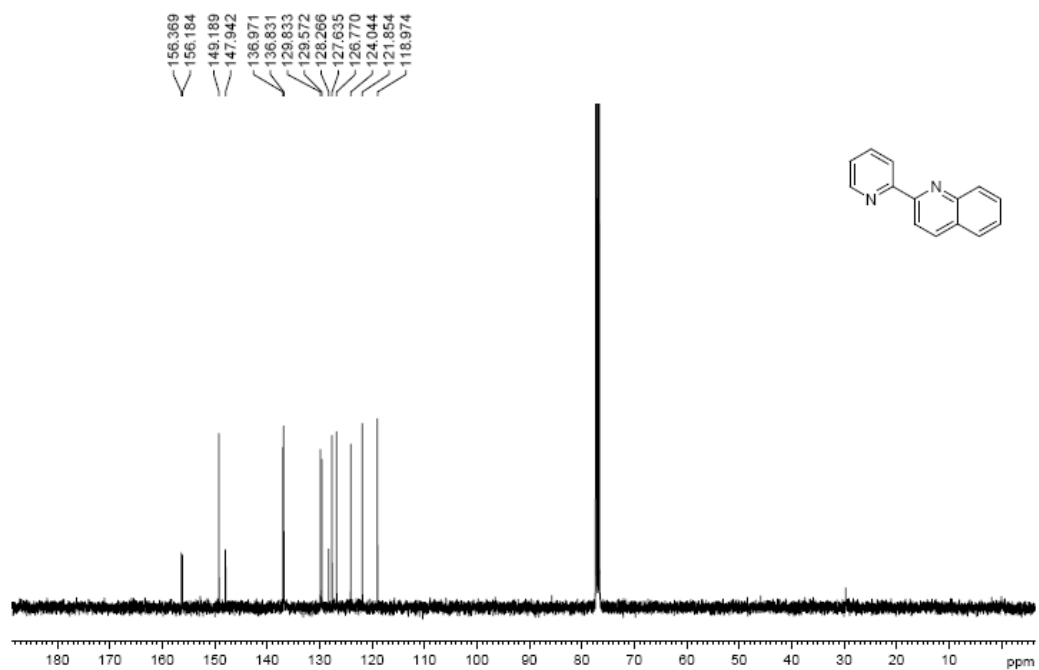

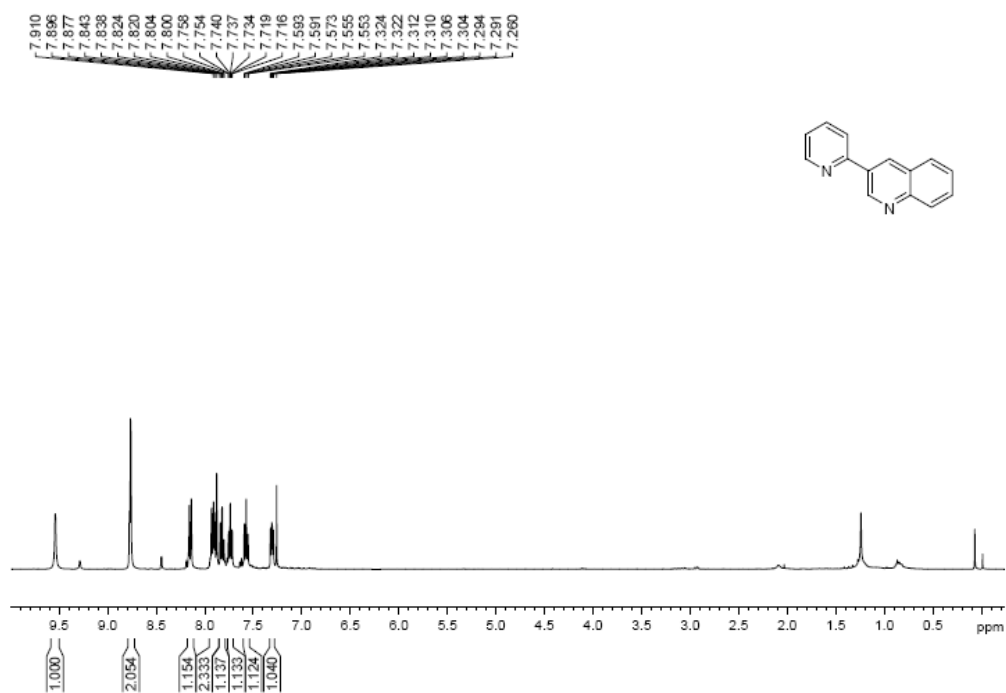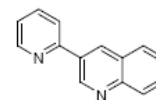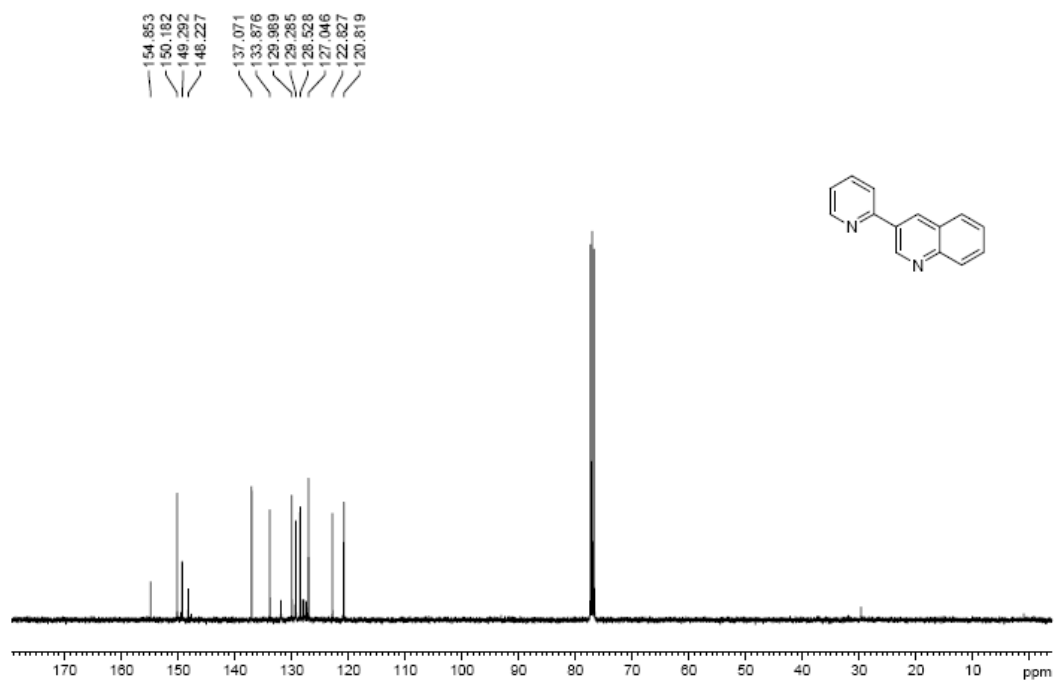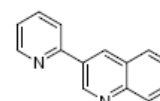

Supplement: c2cc36720c.pdf [file c2cc36720c.pdf]
